# Supplementary material for: Cross-sectional study estimating the psychosocial impact of genital warts and other anogenital diseases in South Korea
Source: PubMed Central journal article supplement — BMJ Open. 2019 Mar 20;9(3):e025035. doi: 10.1136/bmjopen-2018-025035 (PMC6475443; doi:10.1136/bmjopen-2018-025035), 2019-03-20
Supplement: bmjopen-2018-025035.draft_revisions.pdf [file bmjopen-2018-025035.draft_revisions.pdf]

# BMJ Open

BMJ Open is committed to open peer review. As part of this commitment we make the peer review history of every article we publish publicly available.

When an article is published we post the peer reviewers' comments and the authors' responses online. We also post the versions of the paper that were used during peer review. These are the versions that the peer review comments apply to.

The versions of the paper that follow are the versions that were submitted during the peer review process. They are not the versions of record or the final published versions. They should not be cited or distributed as the published version of this manuscript.

BMJ Open is an open access journal and the full, final, typeset and author-corrected version of record of the manuscript is available on our site with no access controls, subscription charges or pay-per-view fees (<http://bmjopen.bmj.com>).

If you have any questions on BMJ Open's open peer review process please email [info.bmjopen@bmj.com](mailto:info.bmjopen@bmj.com)

# BMJ Open

## A Cross-sectional Study Estimating the Psychosocial Impact of Genital Warts and Other Anogenital Diseases in South Korea

|                               |                                                                                                                                                                                                                                                                                                                                                                                                                                                                                                                                                                                                        |
|-------------------------------|--------------------------------------------------------------------------------------------------------------------------------------------------------------------------------------------------------------------------------------------------------------------------------------------------------------------------------------------------------------------------------------------------------------------------------------------------------------------------------------------------------------------------------------------------------------------------------------------------------|
| Journal:                      | <i>BMJ Open</i>                                                                                                                                                                                                                                                                                                                                                                                                                                                                                                                                                                                        |
| Manuscript ID                 | bmjopen-2018-025035                                                                                                                                                                                                                                                                                                                                                                                                                                                                                                                                                                                    |
| Article Type:                 | Research                                                                                                                                                                                                                                                                                                                                                                                                                                                                                                                                                                                               |
| Date Submitted by the Author: | 26-Jun-2018                                                                                                                                                                                                                                                                                                                                                                                                                                                                                                                                                                                            |
| Complete List of Authors:     | Lee , Taek Sang ; SMG-SNU Boramae Medical Center, Department of Obstetrics and Gynecology<br>Kothari-Talwar , Smita ; Merck and Co Inc<br>Singhal, Puneet ; Merck and Co Inc<br>Yee, Karen ; Cubist Pharmaceuticals Inc,<br>Kulkarni , Amit ; Merck and Co Inc,<br>Lara, Nuria; IMS Health Barcelona<br>Roset , Montserrat ; IMS Health Economics and Outcomes Research,<br>Giuliano, Anna; Lee Moffitt Cancer Center and Research Institute<br>Garland, Suzanne; The Royal Women's Hospital, Microbiology and Infectious Diseases Department<br>Ju, Woong; Ewha Womans University, School of Medicine |
| Keywords:                     | genital warts, psychosocial impact, South Korea                                                                                                                                                                                                                                                                                                                                                                                                                                                                                                                                                        |
|                               |                                                                                                                                                                                                                                                                                                                                                                                                                                                                                                                                                                                                        |

SCHOLARONE™  
Manuscripts

Taek Sang Lee

1

1  
2  
3  
4  
5  
6  
7  
8  
9  
10  
11  
12  
13  
14  
15  
16  
17  
18  
19  
20  
21  
22  
23  
24  
25  
26  
27  
28  
29  
30  
31  
32  
33  
34  
35  
36  
37  
38  
39  
40  
41  
42  
43  
44  
45  
46  
47  
48  
49  
50  
51  
52  
53  
54  
55  
56  
57  
58  
59  
60

1 **A Cross-sectional Study Estimating the Psychosocial Impact of Genital Warts and Other**  
2 **Anogenital Diseases in South Korea**

3 **Short Title:** GW: Psychosocial Impact in South Korea

4 **Authors:** Taek Sang Lee PhD, MD<sup>1</sup>, Smita Kothari-Talwar, PhD<sup>2</sup>, Puneet K. Singhal MS, PhD<sup>2</sup>,  
5 Karen Yee PhD<sup>2</sup>, Amit Kulkarni MS, PhD<sup>2</sup>, Nuria Lara MSc, MD<sup>3</sup>, Montserrat Roset<sup>3</sup>, Anna R.  
6 Giuliano PhD<sup>4</sup>, Suzanne M. Garland PhD, MD<sup>5</sup>, Woong Ju MPH, PhD, MD<sup>6\*</sup>

7 <sup>1</sup> Department of Obstetrics and Gynecology, SMG-SNU Boramae Medical Center, Seoul, Korea

8 <sup>2</sup> Merck & Co. Inc., Kenilworth, NJ, USA

9 <sup>3</sup> IMS Health, Barcelona, Spain

10 <sup>4</sup> Center for Infection Research in Cancer (CIRC) at Moffitt Cancer Center, Tampa Florida, USA

11 <sup>5</sup> Royal Women's Hospital, Melbourne, Australia

12 <sup>6</sup> Ewha Womans University, School of Medicine, Seoul, South Korea

13 **\*Corresponding Author:**

14 Woong Ju, MPH, PhD, MD

15 Professor, Ewha Womans University, School of Medicine

16 Postal Address: 1071, Anyangcheon-ro, Seoul, South Korea

17 Email: goodmorning@ewha.ac.kr

Telephone Number: 82-2-2650-5890

FAX: 82-2-2648-5890

18 **Keywords:** Genital Warts, Psychosocial impact, South Korea

19 **Acknowledgements:** The authors acknowledge Furaha Kariburyo, MPH, of STATinMED  
20 Research, for medical writing assistance.

## 18 Abstract

19 **Objectives:** To estimate self-reported human papillomavirus (HPV) disease-related psychosocial  
20 impact among male and female patients in South Korea.

21 **Design:** In this multi-center cross-sectional study, psychosocial impacts were estimated using a  
22 one-time survey capturing HPV Impact Profile (HIP) results, *Cuestionario Específico para*  
23 *Condiloma Acuminado* (CECA; in Spanish) – ‘Specific questionnaire for Condylomata  
24 Acuminata,’ and the EuroQol-5 Dimension (EQ-5D) surveys. T-tests or Mann-Whitney U tests  
25 were used for continuous comparisons; chi-square or Fisher Exact tests were applied for  
26 categorical comparisons.

27 **Setting:** 5,098 clinics throughout Seoul, Busan, Daegu, Kwangju, and Daejeon (South Korea).

28 **Participants:** Patients with and without GW (males) and selected HPV diseases (females)  
29 visiting primary care physicians, obstetricians/gynecologists, urologists, and dermatologists with  
30 2-30 years’ experience.

31 **Results:** Of 150 male and 250 female patients, HIP scores showed 85.3% of male patients with  
32 genital warts (GW) and 32.0% without reported moderate psychological impact ( $p<0.0001$ ). In  
33 categorized total scores, 88.5% of female patients with and 66.0% without selected HPV-related  
34 diseases reported moderate or high psychological impacts ( $p=0.0004$ ). In the CECA  
35 questionnaire, male patients had mean (standard deviation) scores of 10.51 (3.79) in ‘emotional  
36 health’, and 15.90 (6.13) in ‘sexual activity’. Female patients with GW reported lower scores in  
37 both dimensions with mean scores of 7.18 (4.17) in ‘emotional health’ and 10.97 (5.80) in  
38 ‘sexual activity’ ( $p<0.0001$ ), indicating worse health-related quality of life (HRQOL). For the

EQ-5D, male patients with GW reported lower mean visual analog scale scores than those without (75.1 vs. 81.13,  $p < 0.0135$ ). Mean VAS score and utility values were lower for females with HPV-related diseases than those without (72.18 vs. 76.86 and 0.90 vs. 0.94, respectively).

**Conclusion:** In South Korea, GW in men and HPV-related diseases in women negatively impact patient well-being and HRQOL scores. Among women, those with GW suffered a greater psychosocial impact than those with other selected HPV-related diseases.

**Keywords:** genital warts, psychosocial impact, South Korea

#### **Article Summary:**

##### **Strengths and limitations of this study**

- Cross-sectional HIP, CECA, and EQ-5D surveys completed by patients were logged by multiple physician specialties and in different geographic regions in South Korea.
- Patients were stratified into male and female groups and further stratified by GW or HPV-related disease status (with/without)
- Patient survey results were used to assess psychosocial burden (general health, sexual activity, cervical cancer screening behavior, psychosocial impact, GW experience, socio-demographic information).
- Selection bias may have occurred due to the convenience sample approach used.

## 56 Introduction

57 Human papillomaviruses (HPVs) are common sexually transmitted viral infections in  
58 young people [1,2,3]. Of the 130 HPV types that have been identified and sequenced,  
59 approximately 40 have a predilection for the anogenital region. Although they are readily  
60 transmitted, and most are transient, they can cause disease that manifests as genital warts (GW)  
61 and squamous intraepithelial lesions on cervical Pap screenings, and high-risk types are the cause  
62 of anogenital cancers. HPV types 6 and 11 alone are estimated to cause most viral sexually  
63 transmitted infections [4,5]. GW can be exophytic, confluent, cauliflower-like tumors, and their  
64 typical morphologies can aid in diagnosis, although they can also be flat or atypical [6,7,8].

65 To date, few studies have focused on HPV prevalence and related disease among men  
66 and women residing in South Korea. The study, conducted among South Korean women,  
67 observed a low-risk HPV prevalence of 10.3% among those ages 20-29 years and 3.2% among  
68 women ages 50-59 years [9]. While another study observed an overall GW prevalence in South  
69 Korea of 0.7% [10].

70 Studies have shown that GW infection can have a tremendous psychosocial impact on  
71 patients [11, 12, 13]. Some of the highest rates of GW occur in adolescents and young adults at a  
72 time when individuals are particularly impacted by the stigma associated with a visible sexually  
73 transmitted infection (STI). Several key emotions have been identified in GW patients including  
74 anger, disgust, shame, embarrassment, depression, anxiety, worry and a feeling of being less  
75 desirable, which all can have an impact on sexual relationships [14]. In 1998, research by Maw  
76 *et al.* found that up to two-thirds of male and female GW patients made lifestyle changes that  
77 impacted their relationships [15].

1  
2  
3  
4 78 Recognizing the profound impact that GW and other HPV-related diseases can have on  
5  
6  
7 79 patients has led to the creation of tools to assess the burden of these conditions, including the  
8  
9 80 self-administered HPV Impact Profile (HIP) as developed and validated by Mast *et al.*, the  
10  
11 81 European quality of life (EurQol)-5 dimension (EQ-5D), and the *Cuestionario Especifico para*  
12  
13 82 *Condiloma Acuminado* (CECA; in Spanish) – ‘Specific questionnaire for Condylomata  
14  
15 83 *Acuminata*’. These are standardized and commonly used instruments to measure health-related  
16  
17 84 quality of life (HRQoL). [16,17,18]. The HIP was used in a study of Taiwanese women, and  
18  
19 85 results showed that an abnormal Papanicolaou (Pap) result (including abnormal results and any  
20  
21 86 grade of cervical cancer) has a significant psychosocial impact, and a greater impact for those  
22  
23 87 diagnosed with GW [19]. Pirotta *et al.* also found a significant psychosocial impact on Australian  
24  
25 88 women screened for and diagnosed with an HPV-related disease [20]. These women were found  
26  
27 89 to be more likely to have their social lives disrupted, even more so than those being treated for  
28  
29 90 high-grade cervical dysplasia [20].  
30  
31  
32  
33

34 91 Literature on the psychosocial impact of GW in South Korea is scarce. Most available  
35  
36 92 research in the country focuses on cervical cancer, HPV knowledge and attitudes, or intention  
37  
38 93 toward HPV vaccination [21,22,23]. The aim of this study was to evaluate the psychosocial  
39  
40 94 burden of HPV-related diseases, including GW, in South Korea among male and female patients  
41  
42  
43 95 ages 20-60 years.  
44  
45  
46  
47  
48  
49  
50  
51  
52  
53  
54  
55  
56  
57  
58  
59  
60

## 97 **Materials and Methods**

### 98 *Study Design*

99 A cross-sectional study was conducted from July 28, 2011 to November 30, 2011 in five  
100 major cities of South Korea: Seoul, Busan, Daegu, Kwangju, and Daejeon (Appendix Table A-  
101 1). The study targeted clinics where cervical cytology screenings, including GW screenings,  
102 were performed, and where men and women were seen for HPV-related diseases. The study was  
103 approved by the National Evidence-based Health Care Collaborating Agency (NECA), Borame  
104 University Hospital, the SMG-SNU University Medical Center, and the Ewha University  
105 Mokdong Hospital ethics committees. No confidential patient-level data was collected for this  
106 study.

### 107 *Inclusion and Exclusion Criteria*

#### 108 Participating Physicians

109 Participating physicians were identified through an Intercontinental Marketing Services  
110 (IMS) database, a database of nationwide clinics published by Health Insurance Review and  
111 Assessment (HIRA). This database includes information pertaining to 5,098 clinics in the five  
112 targeted cities (Appendix Table A-2). All data collection for this study was conducted in the  
113 office or clinic of the participating physicians.

### 114 Patient and Public Involvement

115 Participant physicians invited their patients for study participation as part of routine practice by  
116 asking their patients if they were willing to participate in a one-time survey and giving them a



1  
2  
3  
4 117 patient informed consent form with a short description of the survey. The physician provided  
5  
6 118 verification on the survey regarding to which group the patient belonged (GW or control group)  
7  
8  
9 119 and administered the survey in the physician's office. Once the survey was completed, the  
10  
11 120 patient's survey was placed in a sealed envelope and left at the physician's office to be sent or  
12  
13 121 picked up by a research coordinator. Patients were not involved in the recruitment to and conduct  
14  
15  
16 122 of the study. Physicians were asked to read the corresponding questions to the patients to avoid  
17  
18 123 any misinterpretation of questions. The results will not be disseminated to study participants.  
19  
20  
21 124 The current study was not a randomized controlled trial.

### 22 23 24 125 Female Patients

25  
26  
27 126 Female patients were included in the study if they were between the ages of 20 and 60  
28  
29 127 years, experienced an HPV-related event within the past 3 months, were in good self-reported  
30  
31 128 health, and belonged to one of the following categories: a) Abnormal Pap test result with no  
32  
33 129 definitive histology, conforming to the Bethesda Category-2001 category of squamous or  
34  
35 130 glandular cell abnormality (for example: atypical cells of undetermined significance [ASCUS],  
36  
37 131 atypical glandular cells of undetermined significance [AGUS], low-grade squamous  
38  
39 132 intraepithelial lesion [LSIL] or high-grade squamous intraepithelial lesion [HSIL]) and no  
40  
41 133 previous high-risk HPV test performed; b) receipt of positive high-risk HPV DNA test results  
42  
43 134 after an abnormal Pap test, as defined in the previous category; c) diagnosis of external GW or  
44  
45 135 treatment for recurrences;  
46  
47  
48  
49 136 d) histological diagnosis of HPV-related cervical dysplasia cervical lesion (eg, CIN1, CIN2, CIN  
50  
51  
52 137 3); e) normal Pap result with no abnormal Pap test or definitive therapy within the past year; or f)  
53  
54  
55 138 two or more of the above conditions (not including GW patients) were categorized in the upper  
56  
57  
58  
59  
60

1  
2  
3  
4 139 level of disease. To enable categorizing of women into discreet disease groups of CIN versus  
5  
6  
7 140 GW, female patients were excluded from the study if they were diagnosed with GW and had any  
8  
9 141 of the following: precancerous cervical lesions, abnormal Pap and HPV-positive, or abnormal  
10  
11 142 Pap test results.  
12  
13

14 143 The control group was selected from the same clinic as the case group. Physicians  
15  
16 144 provided verification on the survey regarding patient groups (GW or control group) and gave  
17  
18 145 them the survey to complete in the physician's office. The physician sample was divided across  
19  
20 146 primary care physicians (general practitioners and internal medicine), obstetrics/gynecologists,  
21  
22 147 urologists, and dermatologists. The control group consisted of patients who have never had GW  
23  
24 148 or received treatment for it or had surgery or therapy in the genital area and included all other  
25  
26 149 patients from a physician's practice or clinic.  
27  
28  
29  
30

### 31 Male Patients

32  
33

34 151 Male patients were included in the study if they were between ages 20 and 60 years, in  
35  
36 152 good self-reported physical health, and belonged to one of the following categories: a) newly  
37  
38 153 diagnosed or existing external GW within the past 3 months of study recruitment; and b) patients  
39  
40 154 who had never been diagnosed with GW, prescribed GW treatment or had surgery or therapy in  
41  
42 155 the genital area.  
43  
44  
45

46 156 Male and female patients were excluded from the study if they: a) had presence of any  
47  
48 157 other concurrent/active STI; b) were concurrently enrolled in clinical studies of investigational  
49  
50 158 agents; c) had a history of known prior or recent (within 1 year of the enrollment date) HPV  
51  
52 159 vaccination; d) had ongoing alcohol or drug abuse; e) were unable to give informed consent; or f)  
53  
54  
55  
56  
57  
58  
59  
60

1  
2  
3  
4 160 had presence of any condition, which in the opinion of the investigator could interfere with the  
5  
6  
7 161 evaluation of the study objectives.  
8  
9

### 10 162 *Survey Instruments*

11  
12 163 To measure the psychosocial burden (general health, sexual activity, cervical cancer  
13  
14 164 screening behavior, psychosocial impact, GW experience, socio-demographic information),  
15  
16  
17 165 participants completed the three validated questionnaires; HIP (HPV Impact Profile), CECA  
18  
19 166 (*Cuestionario Especifico para Condiloma Acuminado* in Spanish– ‘Specific questionnaire for  
20  
21 167 Condylomata Acuminata’) and EQ-5D (EuroQol-5 Dimension) surveys, which were translated to  
22  
23  
24 168 the Korean language and culturally pre-tested. Questionnaires were administered by the  
25  
26 169 participating physician after patients were diagnosed with HPV-related disease. A pilot test was  
27  
28 170 conducted using a small sample of physicians representing all four types of study physicians  
29  
30  
31 171 (two per specialty, eight total). This was to ensure that all survey questions and exercises were  
32  
33 172 understood by respondents, and included culturally appropriate information.  
34

35 173 HIP is a validated, 29-item self-administered questionnaire, designed to measure the  
36  
37 174 psychosocial impact of HPV-related health conditions in women [15]. The response for each  
38  
39  
40 175 item ranges from 0 (lowest impact) to 10 points (highest impact). Items in the HIP survey were  
41  
42 176 linearly transformed to a 0-100 scale, with higher scores indicating better health. To create scale  
43  
44 177 scores, the mean was computed as the sum of the item scores over the number of items answered  
45  
46  
47 178 to account for missing data. If more than 50% of items on the scale were missing, the score was  
48  
49 179 not computed. To create the total scale score, the mean was computed as the sum of all items  
50  
51 180 over the number of items answered on all scales [24]. The scale uses visual-spatial, numeric, and  
52  
53  
54 181 verbal descriptive anchors to assess subject responses. This survey was adapted for use in male  
55  
56 182 patients in consultation with the original developer and has undergone cognitive testing in the  
57  
58  
59  
60

1  
2  
3  
4 183 United States. Overall HIP scores are categorized as: no or little impact (mean HIP score <40),  
5  
6 184 moderate impact (between 40 and 70) and heavy psychological impact (mean HIP score >70)  
7  
8  
9 185 [19].  
10

11 186 The CECA survey includes 10 questions across two domains: emotional and sexual  
12  
13 187 activity [18,25]. CECA scores range from 0 (worst HRQoL) to 100 (best HRQoL). The EQ-5D  
14  
15 188 survey is a two-part questionnaire, including descriptive and thermometer or visual analog scale  
16  
17 189 (VAS), and serves as a generic validated instrument for use as a measure of HRQoL [26]. VAS  
18  
19 190 scores range from 0 (death) to 100 (perfect health).  
20  
21  
22  
23

#### 24 191 *Statistical Analysis*

25  
26  
27 192 All study outcomes were summarized descriptively. A descriptive analysis of the EQ-5D  
28  
29 193 questionnaire was performed and numbers and percentages were provided. The Japanese version  
30  
31 194 of the EQ-5D Instrument was used in this study to estimate the utilities associated with EQ-5D  
32  
33 195 health status [27]. Japan was the first Asian country to develop its own preference EQ-5D  
34  
35 196 weights in 2002. The model was chosen to represent Asian preference weights [28]. VAS scores  
36  
37 197 and utility values were reported using the mean and standard deviation (SD) of the VAS score.  
38  
39 198 VAS scores ranged from 0 (worst HRQoL) to 100 (best HRQoL), and utility values from 0  
40  
41 199 (death) to 1 (perfect health).  
42  
43  
44

45 200 Scores obtained for male and female patients were compared according to GW diagnosis  
46  
47 201 (in men) and HPV-related disease or GW diagnosis (in female patients). For continuous  
48  
49 202 variables, comparisons were performed using the student t-test or Mann-Whitney U test. In  
50  
51 203 addition, the effect size (mean difference between the two means divided by the *pooled* standard  
52  
53 204 deviation) between groups has been calculated. For categorical variables, differences between  
54  
55  
56  
57  
58  
59  
60

1  
2  
3  
4 205 the groups were analyzed using the Chi-square or Fisher Exact test depending on patient  
5  
6  
7 206 distribution across response categories.

8  
9 207 CECA scores were reported using the mean, SD, and 95% confidence interval (CI).  
10  
11 208 Student t-tests were performed to compare CECA scores according to gender.

## 14 209 **Results**

### 16 210 *Socio-demographic and Clinical Characteristics*

18  
19  
20 211 A total of 400 patients participated in the study. Table 1 shows age, marital status, race,  
21  
22 212 highest educational degree, and sexual activity according to gender and HPV diagnosis status.  
23  
24 213 Approximately half of patients included in the study were age 30-44 years (45.3%), 85.9% were  
25  
26 214 in a committed relationship, 51.6% were married, 2.3% earned an education lower than grade 12  
27  
28 215 (including vocational studies), 75.7% were employed, and 22.5% had no health insurance or  
29  
30  
31 216 other health care coverage.  
32

33  
34 217  
35  
36  
37  
38  
39  
40  
41  
42  
43  
44  
45  
46  
47  
48  
49  
50  
51  
52  
53  
54  
55  
56  
57  
58  
59  
60

218 **Table 1. Socio-demographic Characteristics and Sexual Activity of Survey Participants in**  
 219 **South Korea by Gender and GW Diagnosis (men) or HPV-related Diseases (women)**

|                                                            | Men (n=150)    |              | P-value | Women (n=250)       |                       | P-value | Overall     |
|------------------------------------------------------------|----------------|--------------|---------|---------------------|-----------------------|---------|-------------|
|                                                            | With GW (n=75) | No GW (n=75) |         | HPV Disease (n=200) | No HPV Disease (n=50) |         |             |
| <b>Age</b>                                                 |                |              |         |                     |                       |         |             |
| Mean                                                       | 34.07          | 37.32        | 0.0422  | 34.90               | 35.56                 | 0.6695  | 35.28       |
| SD                                                         | 9.48           | 9.96         |         | 9.63                | 10.32                 |         | 9.77        |
| <b>Age group</b>                                           |                |              |         |                     |                       |         |             |
| 20-29 years                                                | 26 (34.7%)     | 19 (25.3%)   | 0.0194  | 70 (35.0%)          | 18 (36.0%)            | 0.9538  | 133 (33.3%) |
| 30-44 years                                                | 40 (53.3%)     | 33 (44.0%)   |         | 86 (43.0%)          | 22 (44.0%)            |         | 181 (45.3%) |
| 45-60 years                                                | 9 (12.0%)      | 23 (30.7%)   |         | 44 (22.0%)          | 10 (20.0%)            |         | 86 (21.5%)  |
| Valid n                                                    | 75             | 75           |         | 200                 | 50                    |         | 400         |
| <b>Committed relationship</b>                              |                |              |         |                     |                       |         |             |
| Yes                                                        | 66 (88.0%)     | 62 (83.8%)   | 0.4596  | 170 (85.4%)         | 44 (88.0%)            | 0.6398  | 342 (85.9%) |
| No                                                         | 9 (12.0%)      | 12 (16.2%)   |         | 29 (14.6%)          | 6 (12.0%)             |         | 56 (14.1%)  |
| Valid n                                                    | 75             | 74           |         | 199                 | 50                    |         | 398         |
| <b>Marital status</b>                                      |                |              |         |                     |                       |         |             |
| Married                                                    | 32 (42.7%)     | 45 (60.8%)   | 0.0976  | 98 (49.0%)          | 31 (62.0%)            | 0.4302  | 206 (51.6%) |
| Widowed/Divorced                                           | 1 (1.3%)       | 1 (1.4%)     |         | 9 (4.5%)            | 2 (4.0%)              |         | 13 (3.3%)   |
| Separated                                                  | 2 (2.7%)       |              |         | 6 (3.0%)            | 1 (2.0%)              |         | 9 (2.3%)    |
| Never married                                              | 40 (53.3%)     | 28 (37.8%)   |         | 87 (43.5%)          | 16 (32.0%)            |         | 171 (42.9%) |
| Valid n                                                    | 75             | 74           |         | 200                 | 50                    |         | 399         |
| <b>Highest degree</b>                                      |                |              |         |                     |                       |         |             |
| Less than grade 12 including vocational education          | 1 (1.3%)       | 1 (1.3%)     | 0.1752  | 4 (2.0%)            | 3 (6.0%)              | 0.1159  | 9 (2.3%)    |
| High school graduate/GED                                   | 18 (24.0%)     | 11 (14.7%)   |         | 67 (33.8%)          | 21 (42.0%)            |         | 117 (29.4%) |
| Some college/technical school including Associate's degree | 12 (16.0%)     | 6 (8.0%)     |         | 54 (27.3%)          | 7 (14.0%)             |         | 79 (19.8%)  |
| Baccalaureate degree                                       | 40 (53.3%)     | 48 (64.0%)   |         | 68 (34.3%)          | 16 (32.0%)            |         | 172 (43.2%) |
| <b>Ever had Sexual intercourse</b>                         |                |              |         |                     |                       |         |             |
| Yes                                                        | 75 (100.0%)    | 70 (93.3%)   | 0.0229  | 198 (99.0%)         | 46 (92.0%)            | 0.0038  | 389 (97.3%) |
| No                                                         |                | 5 (6.7%)     |         | 2 (1.0%)            | 4 (8.0%)              |         | 11 (2.8%)   |
| Valid n                                                    | 75             | 75           |         | 200                 | 50                    |         | 400         |
| <b>Age at first sexual intercourse</b>                     |                |              |         |                     |                       |         |             |
| Mean                                                       | 20.63          | 21.93        | 0.0470  | 21.92               | 22.84                 | 0.1847  | 21.78       |
| SD                                                         | 3.95           | 3.79         |         | 4.19                | 4.18                  |         | 4.11        |
| Valid n patients                                           | 75             | 68           |         | 196                 | 45                    |         | 384         |

|                                                         | Men (n=150)    |              | P-value | Women (n=250)       |                       | P-value | Overall      |
|---------------------------------------------------------|----------------|--------------|---------|---------------------|-----------------------|---------|--------------|
|                                                         | With GW (n=75) | No GW (n=75) |         | HPV Disease (n=200) | No HPV Disease (n=50) |         |              |
| <b>Number of sex partners in the last 5 years</b>       |                |              |         |                     |                       |         |              |
| No partners                                             |                | 2 (2.9%)     | 0.0014  | 6 (3.0%)            | 2 (4.3%)              | 0.6072  | 10 (2.6%)    |
| 1 partner                                               | 9 (12.0%)      | 30 (42.9%)   |         | 103 (52.3%)         | 30 (65.2%)            |         | 172 (44.3%)  |
| 2-5 partners                                            | 47 (62.7%)     | 25 (35.7%)   |         | 65 (33.0%)          | 13 (28.3%)            |         | 150 (38.7%)  |
| 6-10 partners                                           | 10 (13.3%)     | 9 (12.9%)    |         | 9 (4.6%)            |                       |         | 28 (7.2%)    |
| 11-15 partners                                          | 3 (4.0%)       | 1 (1.4%)     |         | 3 (1.5%)            | 1 (2.2%)              |         | 8 (2.1%)     |
| 16-20 partners                                          | 1 (1.3%)       | 2 (2.9%)     |         | 4 (2.0%)            |                       |         | 7 (1.8%)     |
| 21-25 partners                                          | 3 (4.0%)       |              |         | 2 (1.0%)            |                       |         | 5 (1.3%)     |
| 26-50 partners                                          | 1 (1.3%)       |              |         | 2 (1.0%)            |                       |         | 3 (0.8%)     |
| More than 50 partners                                   | 1 (1.3%)       | 1 (1.4%)     |         | 3 (1.5%)            |                       |         | 5 (1.3%)     |
| Valid n                                                 | 75             | 70           |         | 197                 | 46                    |         | 388          |
| <b>Frequency of condom use</b>                          |                |              |         |                     |                       |         |              |
| Never                                                   | 16 (21.3%)     | 26 (37.7%)   | 0.0614  | 86 (43.7%)          | 24 (52.2%)            | 0.2860  | 152 (39.3%)  |
| Less than half the time                                 | 28 (37.3%)     | 13 (18.8%)   |         | 30 (15.2%)          | 10 (21.7%)            |         | 81 (20.9%)   |
| About half the time                                     | 10 (13.3%)     | 12 (17.4%)   |         | 31 (15.7%)          | 3 (6.5%)              |         | 56 (14.5%)   |
| Not always but more than half the time                  | 16 (21.3%)     | 10 (14.5%)   |         | 26 (13.2%)          | 3 (6.5%)              |         | 55 (14.2%)   |
| Always                                                  | 5 (6.7%)       | 7 (10.1%)    |         | 15 (7.6%)           | 5 (10.9%)             |         | 32 (8.3%)    |
| I have not had sexual intercourse in the last 12 months |                | 1 (1.4%)     |         | 9 (4.6%)            | 1 (2.2%)              |         | 11 (2.8%)    |
| Valid n                                                 | 75             | 69           |         | 197                 | 46                    |         | 387          |
| <b>Sexual partners in lifetime</b>                      |                |              |         |                     |                       |         |              |
| Heterosexual partners                                   | 74 (100.0%)    | 70 (100.0%)  |         | 198 (100.0%)        | 46 (100.0%)           |         | 388 (100.0%) |
| Valid n                                                 | 74             | 70           |         | 198                 | 46                    |         | 388          |
| <b>Sexual partners in the last 12 months</b>            |                |              |         |                     |                       |         |              |
| Heterosexual partners                                   | 74 (100.0%)    | 69 (100.0%)  |         | 194 (100.0%)        | 46 (100.0%)           |         | 383 (100.0%) |
| Mean                                                    | 2.57           | 1.80         | 0.0829  | 2.06                | 1.20                  | 0.2046  | 2.01         |
| SD                                                      | 2.81           | 2.49         |         | 4.50                | 0.63                  |         | 3.62         |
| Valid n                                                 | 74             | 69           |         | 194                 | 46                    |         | 383          |

220

221

222 GW=genital warts; HPV=human papillomavirus; SD=standard deviation; GED=general educational development

1  
2  
3  
4 223           The sexual activity of surveyed patients according to gender and GW or selected HPV-  
5  
6  
7 224   related disease is shown in Table 1. Male GW patients reported a younger age at first intercourse  
8  
9 225   compared to female patients (20.6 [4.0] vs. 21.9 [4.2]), and had a greater number of sexual  
10  
11 226   partners (p=0.0014) than those without GW. A higher percentage of female patients with HPV-  
12  
13 227   related diseases reported having had sexual intercourse compared to those without HPV-related  
14  
15 228   diseases (99.0% vs. 92.0%, p=0.0038). No statistically significant differences were observed for  
16  
17  
18 229   any of the remaining sexual activity questions, as reported in Table 1.  
19  
20  
21 230  
22 231  
23  
24 232



233 *Psychosocial Impact*

234 HIP scores for male and female patients are summarized in Table 2. Significantly higher  
 235 HIP scores were observed among men with GW compared to those without GW for all domains  
 236 of the score except for ‘control-life impact’. Eighty-five percent of men with GW and 32.0% of  
 237 men without GW reported a moderate psychological impact ( $p < 0.0001$ ).

238 **Table 2. HIP Questionnaire Scores of Participating Patients by GW and HPV-related**  
 239 **Diagnosis in South Korea**

|                             | Men (n=150)    |              | ES   | P-value | Women (n=250)*      |                       | ES   | P-value |
|-----------------------------|----------------|--------------|------|---------|---------------------|-----------------------|------|---------|
|                             | With GW (n=75) | No GW (n=75) |      |         | HPV Disease (n=200) | No HPV Disease (n=50) |      |         |
| <b>HIP total score</b>      |                |              |      |         |                     |                       |      |         |
| Mean                        | 50.90          | 36.13        | 1.69 | <0.0001 | 53.37               | 44.98                 | 0.68 | <0.0001 |
| 95% CI                      | (48.8; 53.0)   | (34.3; 38.0) |      |         | (51.8; 55.0)        | (41.4; 48.6)          |      |         |
| Valid n                     | 75             | 75           |      |         | 199                 | 50                    |      |         |
| <b>Worries and concerns</b> |                |              |      |         |                     |                       |      |         |
| Mean                        | 49.65          | 24.25        | 1.51 | <0.0001 | 57.19               | 41.94                 | 0.63 | <0.0001 |
| 95% CI                      | (45.5; 53.8)   | (20.8; 27.7) |      |         | (54.2; 60.2)        | (35.5; 48.4)          |      |         |
| Valid n                     | 75             | 75           |      |         | 199                 | 49                    |      |         |
| <b>Emotional impact</b>     |                |              |      |         |                     |                       |      |         |
| Mean                        | 49.10          | 33.98        | 1.19 | <0.0001 | 56.08               | 42.32                 | 0.84 | <0.0001 |
| 95% CI                      | (46.0; 52.2)   | (31.3; 36.6) |      |         | (53.8; 58.4)        | (37.8; 46.8)          |      |         |
| Valid n                     | 75             | 75           |      |         | 199                 | 50                    |      |         |
| <b>Sexual impact</b>        |                |              |      |         |                     |                       |      |         |
| Mean                        | 47.53          | 41.20        | 0.51 | 0.0019  | 50.81               | 49.80                 | 0.07 | 0.6550  |
| 95% CI                      | (45.1; 50.0)   | (38.1; 44.3) |      |         | (48.9; 52.8)        | (45.3; 54.3)          |      |         |
| Valid n                     | 75             | 75           |      |         | 197                 | 49                    |      |         |
| <b>Self-Image</b>           |                |              |      |         |                     |                       |      |         |
| Mean                        | 49.00          | 41.63        | 0.76 | <0.0001 | 47.66               | 45.17                 | 0.19 | 0.2226  |
| 95% CI                      | (46.5; 51.5)   | (39.8; 43.5) |      |         | (45.9; 49.5)        | (41.4; 48.9)          |      |         |
| Valid n                     | 75             | 75           |      |         | 199                 | 50                    |      |         |

|                                        | Men (n=150)    |              | ES   | P-value | Women (n=250)*      |                       | ES   | P-value |
|----------------------------------------|----------------|--------------|------|---------|---------------------|-----------------------|------|---------|
|                                        | With GW (n=75) | No GW (n=75) |      |         | HPV Disease (n=200) | No HPV Disease (n=50) |      |         |
| <b>Partner issues and transmission</b> |                |              |      |         |                     |                       |      |         |
| Mean                                   | 62.16          | 42.12        | 1.40 | <0.0001 | 58.86               | 47.23                 | 0.62 | 0.0001  |
| 95% CI                                 | (59.1; 65.2)   | (38.5; 45.8) |      |         | (56.2; 61.5)        | (41.8; 52.6)          |      |         |
| Valid n                                | 74             | 66           |      |         | 185                 | 47                    |      |         |
| <b>Interactions with doctors</b>       |                |              |      |         |                     |                       |      |         |
| Mean                                   | 51.31          | 33.28        | 0.90 | <0.0001 | 46.75               | 45.73                 | 0.20 | 0.6611  |
| 95% CI                                 | (47.4; 55.3)   | (25.2; 41.4) |      |         | (44.8; 48.7)        | (40.8; 50.6)          |      |         |
| Valid n                                | 71             | 30           |      |         | 199                 | 50                    |      |         |
| <b>Control - life impact</b>           |                |              |      |         |                     |                       |      |         |
| Mean                                   | 49.69          | 52.13        | 0.23 | 0.1643  | 48.48               | 52.37                 | 0.31 | 0.0641  |
| 95% CI                                 | (47.3; 52.0)   | (49.6; 54.7) |      |         | (46.6; 50.4)        | (49.2; 55.5)          |      |         |
| Valid n                                | 75             | 75           |      |         | 199                 | 50                    |      |         |
| <b>HIP total score categorized</b>     |                |              |      |         |                     |                       |      |         |
| No or little impact                    | 11 (14.7%)     | 51 (68.0%)   |      | <0.0001 | 23 (11.5%)          | 17 (34.0%)            |      | 0.0004  |
| Moderate impact                        | 64 (85.3%)     | 24 (32.0%)   |      |         | 168 (84.0%)         | 30 (60.0%)            |      |         |
| Heavy psychological impact             |                |              |      |         | 9 (4.5%)            | 3 (6.0%)              |      |         |
| Valid n                                | 75             | 75           |      |         | 200                 | 50                    |      |         |

\* HPV=human papillomavirus is included in this table. GW=genital warts; CI=confidence interval; HIP=human papillomavirus impact profile; ES=Effect size. Effect size (ES) >0.01 is considered significant. HIP items range from 0 (lowest impact) to 10 point (highest impact). CECA scores range from 0 (worst HRQL) to 100 (the best HRQL) EQ-5D range from 0 (worst imaginable health state) to 100 (best imaginable health state)

When comparing women diagnosed with HPV-related disease to those without disease, significant differences were observed for the ‘worries and concerns’, ‘emotional impact’, and ‘partner’s issues and transmission’ domains. In all domains, female patients with HPV-related disease had higher scores, reflecting a higher psychological impact (88.5% of female patients

1  
2  
3  
4 251 with selected HPV-related diseases vs. 66.0% without reported a moderate or heavy  
5  
6  
7 252 psychological impact [ $p=0.0004$ ]).

8  
9 253 HIP scores by specific HPV-related disease were also conducted. In all domains except  
10  
11 254 for ‘control-life impact’ and ‘emotional impact’, significant differences were identified. Higher  
12  
13 255 scores, and thereby higher psychological impact, were reported by patients with external GW.  
14  
15 256 All GW patients had either moderate or heavy psychological impact (90.0% and 10.0%,  
16  
17 257 respectively). In all domains, female patients with selected HPV-related diseases had higher  
18  
19 258 scores, reflecting a higher psychological impact (Appendix Table A-3).

20  
21  
22  
23 259 CECA scores stratified by gender are shown in Figure 1. Women with GW reported  
24  
25 260 significantly lower scores on the ‘emotional health’ (mean [SD], 7.2 [4.2]), and ‘sexual activity’  
26  
27 261 dimensions (11.0 [5.8]) compared to men with GW – ‘emotional health’ dimension (10.5 [3.8])  
28  
29 262 and ‘sexual activity’ dimension (15.9 [6.1]) – indicating worse HRQoL among women.

30  
31  
32 263 No significant differences were observed for problems reported by male patients in the  
33  
34 264 EQ-5D descriptive system by GW diagnosis, as most male patients reported no problems.  
35  
36 265 Among those who reported problems, the most frequent were ‘pain-discomfort’ (10.7%) and  
37  
38 266 ‘anxiety-depression’ (12.7%, Table 3). Female patients with selected HPV-related diseases  
39  
40 267 reported more problems related to the EQ-5D ‘anxiety-depression’ dimension than those without.  
41  
42 268 Thirty-one percent of those with selected HPV-related diseases reported feeling moderately or  
43  
44 269 extremely anxious or depressed, compared to 10.0% of female patients without HPV-related  
45  
46 270 diseases. There were no statistically significant differences in the remaining EQ-5D items  
47  
48 271 between female patients with and without HPV-related diseases (Table 3).  
49  
50  
51  
52  
53  
54  
55  
56  
57  
58  
59  
60

272 **Table 3. EQ-5D Descriptive System Results by Male and Female patients with and without**  
 273 **GW and Selected HPV-related Diseases in South Korea**

|                                                          | Men (n=150)    |              | P-value | Women (n=250)       |                       | P-value |
|----------------------------------------------------------|----------------|--------------|---------|---------------------|-----------------------|---------|
|                                                          | With GW (n=75) | No GW (n=75) |         | HPV Disease (n=200) | No HPV Disease (n=50) |         |
| <b>Mobility</b>                                          |                |              |         |                     |                       |         |
| I have no problems walking about                         | 73 (97.3%)     | 75 (100.0%)  | 0.1545  | 193 (97.0%)         | 49 (98.0%)            | 0.6979  |
| I have some problems walking about                       | 2 (2.7%)       |              |         | 6 (3.0%)            | 1 (2.0%)              |         |
| Valid n                                                  | 75             | 75           |         | 199                 | 50                    |         |
| <b>Self-Care</b>                                         |                |              |         |                     |                       |         |
| I have no problems with self-care                        | 75 (100.0%)    | 75 (100.0%)  | --      | 197 (99.0%)         | 50 (100.0%)           | 0.7762  |
| I have some problems washing or dressing myself          |                |              |         | 1 (0.5%)            |                       |         |
| I am unable to wash or dress myself                      |                |              |         | 1 (0.5%)            |                       |         |
| Valid n                                                  | 75             | 75           |         | 199                 | 50                    |         |
| <b>Usual Activities</b>                                  |                |              |         |                     |                       |         |
| I have no problems with performing my usual activities   | 72 (96.0%)     | 75 (100.0%)  | 0.0802  | 196 (98.5%)         | 49 (98.0%)            | 0.8044  |
| I have some problems with performing my usual activities | 3 (4.0%)       |              |         | 3 (1.5%)            | 1 (2.0%)              |         |
| Valid n                                                  | 75             | 75           |         | 199                 | 50                    |         |
| <b>Pain - Discomfort</b>                                 |                |              |         |                     |                       |         |
| I have no pain or discomfort                             | 65 (86.7%)     | 69 (92.0%)   | 0.2900  | 165 (82.9%)         | 40 (80.0%)            | 0.6291  |
| I have moderate pain or discomfort                       | 10 (13.3%)     | 6 (8.0%)     |         | 34 (17.1%)          | 10 (20.0%)            |         |
| Valid n                                                  | 75             | 75           |         | 199                 | 50                    |         |
| <b>Anxiety - Depression</b>                              |                |              |         |                     |                       |         |
| I am not anxious or depressed                            | 66 (88.0%)     | 65 (86.7%)   | 0.8061  | 136 (68.3%)         | 45 (90.0%)            | 0.0078  |
| I am moderately anxious or depressed                     | 9 (12.0%)      | 10 (13.3%)   |         | 56 (28.1%)          | 5 (10.0%)             |         |
| I am extremely anxious or depressed                      |                |              |         | 7 (3.5%)            |                       |         |
| Valid n                                                  | 75             | 75           |         | 199                 | 50                    |         |

274 EQ-5D=EuroQol-5 Dimension; GW=genital warts; HPV=human papillomavirus; SD=standard deviation

275 'HIP items range from 0 (lowest impact) to 10 point (highest impact).

276 CECA scores range from 0 (worst HRQL) to 100 (the best HRQL)

277 EQ-5D range from 0 (worst imaginable health state) to 100 (best imaginable health state)

278

279

EQ-5D descriptive system responses were also compared among female patients by HPV-related disease (Appendix Table A-4). The only two dimensions with significant differences were 'pain/discomfort' ( $p=0.0146$ ) and 'anxiety/depression' ( $p=0.0387$ ). A higher percentage of female GW patients reported being 'moderately anxious or depressed' and 'extremely anxious or depressed' (48.0%), followed by those with precancerous lesions (34.7%) and those presenting abnormal Pap test and HPV positive results (24.0%) (Appendix Table A-4).

Table 4 shows VAS scores and utility values obtained from male participants according to GW diagnosis. Those patients with GW reported significantly lower mean VAS scores (75.3) than those without (81.1,  $p=0.0135$ ). No significant differences in utility values according to GW diagnosis were identified.

**Table 4 EQ-5D VAS Scores and Utility Values by Male Patients with and without GW and Female Patients with and without Selected HPV-related Disease in South Korea**

|                       | Men (n=150)    |              | ES    | P-value | Overall      | Women (n=250)       |                       | ES   | P-value | Overall      |
|-----------------------|----------------|--------------|-------|---------|--------------|---------------------|-----------------------|------|---------|--------------|
|                       | With GW (n=75) | No GW (n=75) |       |         |              | HPV disease (n=200) | No HPV disease (n=50) |      |         |              |
| <b>VAS (EQ-5D)</b>    |                |              |       |         |              |                     |                       |      |         |              |
| Mean                  | 75.31          | 81.13        | 0.41  | 0.0135  | 78.16        | 72.18               | 76.86                 | 0.30 | 0.0606  | 73.14        |
| 95% CI                | (71.6; 79.0)   | (78.4; 83.9) |       |         | (75.8; 80.5) | (69.9; 74.4)        | (72.6; 81.1)          |      |         | (71.2; 75.1) |
| Valid n               | 74             | 71           |       |         | 145          | 190                 | 49                    |      |         | 239          |
| <b>Utility values</b> |                |              |       |         |              |                     |                       |      |         |              |
| Mean                  | 0.95           | 0.95         | <0.01 | 0.7527  | 0.95         | 0.90                | 0.94                  | 0.27 | 0.0773  | 0.91         |
| 95% CI                | (0.9; 1.0)     | (0.9; 1.0)   |       |         | (0.9; 1.0)   | (0.9; 0.9)          | (0.9; 1.0)            |      |         | (0.9; 0.9)   |
| Valid n               | 75             | 75           |       |         | 150          | 199                 | 50                    |      |         | 249          |

293

294 HPV = human papillomavirus; GW = genital warts; CI = confidence interval; EQ-5D = EuroQol-5 Dimension; ES =  
295 Effect size. Effect size (ES) >0.01 is considered significant.

296

297 'HIP items range from 0 (lowest impact) to 10 point (highest impact).

298 CECA scores range from 0 (worst HRQL) to 100 (the best HRQL)

299 EQ-5D range from 0 (worst imaginable health state) to 100 (best imaginable health state)

300

301

302 Female patients with selected HPV-related diseases showed numerically lower mean  
303 VAS scores (72.2) and utility values (0.90) than those without selected HPV-related diseases  
304 (76.86 and 0.94, respectively), but the differences were not significant. When comparing selected  
305 HPV-related diseases, the lowest VAS and utility scores (worst HRQoL) were observed in GW  
306 patients ( $p < 0.0001$ , Appendix Table A-5).

## 307 Discussion

308 This cross-sectional study estimated the psychosocial burden of GW and HPV related  
309 diseases in South Korea by obtaining self-reported HPV disease-related information among male  
310 and female patients age 20-60 years presenting to clinics where cervical cytology screenings,  
311 including GW screenings, were performed, and where men and women were seen for HPV-  
312 related diseases. To our knowledge, this is the first study that has looked at the psychosocial  
313 burden of GW and HPV-related disease on patients' quality of life in South Korea. Higher HIP  
314 score values, reflecting a greater psychosocial impact of the disease, were recorded for men with  
315 GW than for those without GW (50.90 vs. 36.13) and in women diagnosed with HPV-related  
316 diseases than for those without (53.37 vs. 44.98).

317 Overall, female patients had a greater psychosocial impact compared to male patients  
318 (HIP scores: 51.69 vs. 43.51). Similarly, male patients had better HRQoL indicating lower  
319 psychosocial impact compared to female patients, as assessed by CECA scores (6.33 vs. 4.34).

1  
2  
3  
4 320 VAS scores ranged from 0 (worst imaginable health status) to 100 (best imaginable health  
5  
6  
7 321 status), and female patients reported worse health status (73.14) compared to male patients  
8  
9 322 (78.16), particularly female patients with HPV-related diseases (72.18). In addition, GW patients  
10  
11 323 reported worse HRQoL scores compared to those without GW in the disease-specific HIP  
12  
13 324 questionnaire. Furthermore, women reported poorer health status following a GW diagnosis than  
14  
15 325 a CIN diagnosis. These results are consistent with a Chinese study by Wang *et al* [29] which  
16  
17 326 reported that female GW patients had the highest mean HIP scores (52.2), showing a significant  
18  
19 327 psychological impact, followed by patients with precancerous cervical lesions (48.6), HPV after  
20  
21 328 abnormal Pap test results (45.8), abnormal Pap test results without HPV test (44.1), and HPV  
22  
23 329 after abnormal Pap test results (43.1).

24  
25  
26  
27 330 In the current study, HRQoL results suggest that GW in males and HPV-related disease  
28  
29 331 (high-grade dysplasia requiring ablation treatment) in female patients had a negative impact on  
30  
31 332 patient well-being and HRQoL scores. This study also observed that female GW patients  
32  
33 333 suffered a major impact compared to those with other selected HPV-related diseases. Previous  
34  
35 334 studies have shown that patients with GW had significantly lower quality of life, and substantial  
36  
37 335 psychosocial burden with higher social stigma – especially when GW infection is symptomatic,  
38  
39 336 visible to the naked eye, and found in the genital region [30,31,32]. In addition, a study that  
40  
41 337 compared GW patients with asymptomatic genitourinary internal medicine patients observed that  
42  
43 338 patients with GW had a significantly higher psychological burden because of the GW infection  
44  
45 339 compared to the other patients. The study also observed that infection with GW not only  
46  
47 340 influences the patient's physical wellbeing but also has a potentially detrimental effect on the  
48  
49 341 patient's emotions [33].

50  
51  
52  
53 342 This could explain the observed poorer health status in GW patients evaluated in this study.  
54  
55  
56  
57  
58  
59

1  
2  
3  
4 343 Furthermore, the highest score was in the ‘partner issue and transmission’ category, followed by  
5  
6  
7 344 ‘worries and concerns’ and ‘emotional impact’, with a HIP mean score >60. The lowest scores  
8  
9 345 were in the ‘control-life impact’ category (mean HIP score 45.20). A similar study using the HIP  
10  
11 346 survey instrument in Australia found that the largest impact of GW on quality of life was in the  
12  
13 347 domains of ‘sexual impact’, ‘self-image,’ and ‘partner and transmission’ [24].  
14  
15

16 348 Based on EQ-5D survey results, GW and selected HPV-related disease patients reported  
17  
18 349 more problems related to ‘anxiety-depression’ than those without these conditions. The current  
19  
20 350 study detected a lower impact of GW as assessed by EQ-5D than in the previous Canadian study  
21  
22 351 [34]. HRQoL scores in each of the questionnaires reported by female study patients were  
23  
24 352 descriptively compared among the study subgroups (abnormal Pap result, abnormal Pap and  
25  
26 353 HPV positive results, precancerous lesions, and external GW). While GW has an impact on  
27  
28 354 HRQoL in the current study, the precise impact is difficult to assess due to scarcity of data and  
29  
30 355 the heterogeneity of the instruments used to compare scores of GW patients with those of the  
31  
32 356 general population [35].  
33  
34  
35

36 357 Shin *et al.* conducted a similar study in mainland China in 2012 and found that 56.4% of  
37  
38 358 patients reported some problems in the ‘anxiety and depression’ dimension (highest), followed  
39  
40 359 by ‘pain and discomfort’ (24.7%) and ‘mobility’ (3.5%) [16]. In a study from the United  
41  
42 360 Kingdom in 2008, Woodhall *et al.* found that female GW patients had lower VAS and EQ-5D  
43  
44 361 index scores than control patients, even after adjusting for age and gender. The difference was  
45  
46 362 particularly notable in young women [36]. Consistent with the current study results, Woodhall *et*  
47  
48 363 *al.* also reported that the ‘pain and discomfort’ and ‘depression and anxiety’ dimensions were the  
49  
50 364 two most affected domains.  
51  
52  
53  
54  
55  
56  
57  
58  
59  
60



1  
2  
3  
4 365 This study also observed that 60% of women with no GW reported a moderate impact in  
5  
6  
7 366 the HIP scoring. Reasons for this impact level among these patients were not evaluated.  
8  
9 367 However, there is the possibility that these patients may have had other conditions during  
10  
11 368 presentation at the clinic that may have impacted their HIP score.

12  
13 369 Overall, the results of the current study suggest that a GW diagnosis has a great  
14  
15  
16 370 psychosocial impact on female patients. Other studies have provided evidence that the  
17  
18 371 psychosocial impact of sexually transmitted disease diagnoses may be greater for women than  
19  
20 372 for men. The origin of these differences is not clear, but they may be due to sexual infectivity  
21  
22 373 and reproductive health [36]. Furthermore, research among women who received abnormal  
23  
24 374 cervical smear test results have indicated that they often experienced psychosocial consequences  
25  
26 375 including anxiety, fears about cancer, sexual difficulties, changes in body image and concerns  
27  
28 376 regarding loss of reproductive function [13,37]. Shi *et al.* also indicated in their study that  
29  
30 377 culture plays an important role, as conservative cultures (such as South Korea) view a diagnosis  
31  
32 378 of a sexually transmitted disease such as GW as disgraceful. Consequently, patients would not  
33  
34 379 seek support, even from their own families [16]. Additionally, continued study of HPV natural  
35  
36 380 history among men from different geographic regions is necessary to elucidate the underlying  
37  
38 381 HPV-related diseases occurring in these populations.

## 382 **Limitations**

383  
384 The current study is limited, as selection bias may have occurred due to the convenience  
385  
386 sample approach used. The data were collected in participating physician offices and clinics  
387  
388 through questionnaires and interview-based surveys. Patients may have given expected rather  
389  
390 than truthful answers, which may not give the true psychosocial impact. Moreover, only patients

1  
2  
3  
4 387 who sought professional GW treatment were included in the study, which may not be  
5  
6  
7 388 generalizable to the entire South Korean GW population. As the study was cross-sectional in  
8  
9 389 design, it can only report the impact of GW on the patients at the time the survey was taken,  
10  
11 390 rather than longer-term impact. However, in a longitudinal study conducted to determine the  
12  
13 391 impact of HPV status on quality of life (QoL) in oral cavity and oropharyngeal squamous cell  
14  
15 392 carcinoma, results showed that QoL scores were lower in HPV positive patients. [38] The study  
16  
17 393 design is a simple descriptive comparison of outcomes, so potential factors that might mediate or  
18  
19 394 moderate the psychosocial effects of GW were not evaluated. We recommend that for future  
20  
21 395 studies on GW in South Korea, multivariate analysis be carried out to address these factors.  
22  
23  
24

## 25 396 **Conclusion**

26 397  
27 398 The diagnosis of GW, a common sexually transmitted disease, has significant associated  
28  
29 399 morbidity – largely due to the psychosocial impact GW have on patients. Prevention of all HPV-  
30  
31 400 related diseases, cancers, and non-cancerous lesions is important. Vaccines that have broad  
32  
33 401 protection against multiple HPV types should be considered. In addition, the results of this study  
34  
35 402 can help direct guidelines for patient counseling and health education and emphasize the need to  
36  
37 403 include HPV vaccine programs as a part of national vaccine programs. The purpose of this study  
38  
39 404 was to determine the psychosocial impact of GW among male and female patients in South  
40  
41 405 Korea utilizing various validated tools, given that literature related to the psychosocial impact of  
42  
43 406 GW is scarce in this country. The current study results, utilizing HRQoL, suggest that GW in  
44  
45 407 males and high-grade dysplasia requiring ablation treatment in female patients have a negative  
46  
47 408 impact on patient well-being and HRQoL. The psychosocial burden was particularly greater  
48  
49 409 among female GW patients compared to those with other selected HPV-related disease.  
50  
51  
52  
53  
54  
55  
56  
57  
58  
59  
60

1  
2  
3  
4 410 Although recent studies have looked at the psychosocial impact of GW on HRQoL in  
5  
6  
7 411 other places like China, [11] Singapore, [12] and the UK, [13] this study highlights the  
8  
9 412 psychosocial impact of GW on HRQoL for infected patients in South Korea. Previously  
10  
11 413 published studies used for comparison to the results of this study vary substantially in  
12  
13 414 methodology and are different in nature due to the dissimilarities of GW across regions and  
14  
15 415 cultures. However, the current study offers baseline data, and further research is encouraged to  
16  
17 416 measure the psychosocial burden of GW in South Korea. Despite its limitations, the current  
18  
19 417 study offers groundwork for measurement of the psychosocial impact of GW in South Korea that  
20  
21 418 was previously unavailable.  
22  
23  
24

## 25 419 **Contributorship Statement**

26  
27  
28  
29 420 TSL, SKT, PKS, KY, AK, ARG, SMG, WJ, NL, and MR conceived and designed the experiments for  
30  
31 421 this manuscript.  
32

33  
34 422 NL, MR, SKT, PKS, AK performed the experiments for this manuscript.  
35

36 423 NL, MR analyzed the data for this manuscript.  
37

38  
39 424 NL, MR contributed reagents/materials/analysis tools for this manuscript.  
40

41 425 All authors contributed to the writing of this manuscript.  
42  
43  
44  
45 426  
46  
47  
48  
49  
50  
51  
52  
53  
54  
55  
56  
57  
58  
59  
60

## 427 **Funding**

428 This study was funded by Merck and Co.

## 429 **Competing Interests**

- 430     ▪ T.S. Lee has no conflicts to declare.
- 431     ▪ K. Yee was a paid contractor for Merck and Co. at the time of the study and was an  
432       employee of Cubist Pharmaceuticals December 2014 – July 2015, which was acquired by  
433       Merck and Co. in January 2015.
- 434     ▪ A. Kulkarni, S. Kothari-Talwar, and P.K. Singhal are employees of Merck and Co.
- 435     ▪ S.M. Garland received Grants to her institution from the Commonwealth Department of  
436       Health for HPV genoprevalance surveillance post vaccination, Merck and Co., and Glaxo  
437       Smith Kline to perform phase 3 clinical vaccine trials: Merck to evaluate HPV in RRP  
438       post vaccination programme; CSL for HPV in cervical cancer study, and VCA for a study  
439       on the effectiveness of a public health HPV vaccine study, and a study on the associations  
440       of early onset cancers. Received speaking fees from MSD and SPMSD for work  
441       performed in her personal time. Merck and Co. paid for travel & accommodation to  
442       present at HPV Advisory board meetings.
- 443     ▪ A.R. Giuliano is a member of Merck & CO, Inc. advisory boards. Her institution has  
444       received grants and contracts to support HPV-related research.
- 445     ▪ N. Lara and M. Roset are employees of IMS Health, Barcelona, Spain, which is a paid  
446       consultant to Merck and Co.
- 447     ▪ W. Ju has no conflicts to declare.

## 448 **Data Sharing Agreement**

449 The data collected is the property of Merck & Co. Inc., and can be accessed with permission  
450 from Merck & Co. Inc

## 451 **Supporting Information**

### 452 **Figure Legends**

#### 453 **Figure 1. CECA Questionnaire Scores by Male and Female Patients with GW in South** 454 **Korea**

455 CECA=*Cuestionario Específico para Condiloma Acuminado* (in Spanish) – ‘Specific questionnaire for  
456 Condylomata Acuminata’; GW=genital warts

### 457 **Participating Physicians by Region in South Korea**

458 DERM=dermatologist; OBGYN=obstetrician/gynecologist; PCP=primary care physician; URO=urologist

#### 459 **Table A-1. Target Number Of Clinics Within A Specialty Per City in South Korea**

#### 460 **Table A-2. Participating Physicians by Region in South Korea**

#### 461 **Table A-3. HIP Questionnaire Scores by Female Patients and selected HPV-related** 462 **diseases in South Korea**

463 HPV=human papillomavirus; HIP=HPV impact profile; Pap=Papanicolaou test; GW=genital warts; CI=confidence  
464 interval

#### 465 **Table A-4. EQ-5D Descriptive System Results by Female Patients and selected HPV-** 466 **related Diseases in South Korea (excluding control group)**

467 EQ-5D=EuroQol-5 Dimension; HPV=human papillomavirus; Pap=Papanicolaou test; GW=genital warts

#### 468 **Table A-5. EQ-5D VAS and Utility Scores for Female Patients by selected HPV-related** 469 **Diseases in South Korea (excluding control group)**

470 EQ-5D=EuroQol-5 Dimension; VAS=visual analog scores; HPV=human papillomavirus;

471 Pap=Papanicolaou test; GW=genital warts; CI=confidence interval

472 **References**

1. Arima Y, Winer RL, Feng Q, et al. Development of genital warts after incident detection of human papillomavirus infection in young men. *J Infect Dis.* 2010;202(8):1181-4.
2. Patel H, Wagner M, Singhal P, Kothari S. Systematic review of the incidence and prevalence of genital warts. *BMC Infect Dis.* 2013;13(1):39.
3. Pirotta MV, Stein AN, Fairley CK, et al. Patterns of treatment of external genital warts in Australian sexual health clinics. *Sex Transm Dis.* 2009;36(6):375-9.
4. Winer RL, Lee SK, Hughes JP, et al. Genital human papillomavirus infection: incidence and risk factors in a cohort of female university students. *Am J Epidemiol.* 2003;157(3):218-26.
5. Flores-Díaz E, Sereday KA, Ferreira S, et al. HPV-6 molecular variants association with the development of genital warts in men: The HIM Study. *J Infect Dis.* 2016;215(4):559-56.
6. Gall SA. Female genital warts: global trends and treatments. *Infect Dis Obstet Gynecol.* 2001;9(3):149-54.
7. Garland SM, Steben M, Sings HL, et al. Natural history of genital warts: Analysis of the placebo arm of 2 randomized phase III trials of a quadrivalent human papillomavirus (types 6, 11, 16, and 18) vaccine. *J Infect Dis.* 2009;199(6):805-14.
8. Stamm AW, Kobashi KC, Stefanovic KB. Urologic Dermatology: a Review. *Curr Urol Rep.* 2017;18(8):6.
9. Kim MA, Oh JK, Kim BW, et al. Prevalence and seroprevalence of low-risk human papillomavirus in Korean women. *J Korean Med Sci.* 2012;27(8):922-8.

- 10 Lee TS, Kothari-Talwar S, Singhal PK, et al. A cross-sectional study estimating the burden of illness related to genital warts in South Korea. *BMJ Open*. 2017;7(6):e01421.
- 11 Tan LS, Chio MT, Sen P, et al. Assessment of psychosocial impact of genital warts among patients in Singapore. *Sex Health*. 2014;11(4):313-318.
- 12 Qi SZ, Wang SM, Shi JF, et al. Human papillomavirus-related psychosocial impact of patients with genital warts in China: a hospital-based cross-sectional study. *BMC Public Health*. 2014;14(1):739.
- 13 Dominiak-Felden G, Cohet C, Atrux-Tallau S, et al. Impact of human papillomavirus-related genital diseases on quality of life and psychosocial wellbeing: results of an observational, health-related quality of life study in the UK. *BMC Public Health*. 2013;13(1):1065.
- 14 Jeynes C, Chung M, Challenor R. 'Shame on you'—the psychosocial impact of genital warts. *Int J STD AIDS*. 2009;20(8):557-60.
- 15 Maw R, Reitano M, Roy M. An international survey of patients with genital warts: perceptions regarding treatment and impact on lifestyle. *Int J STD AIDS*. 1998;9(10):571-8.
- 16 Mast TC, Zhu X, Demuro-Mercon C, et al. Development and psychometric properties of the HPV Impact Profile (HIP) to assess the psychosocial burden of HPV. *Curr Med Res Opin*. 2009;25(11):2609-19.
- 17 Shi JF, Kang DJ, Qi SZ, et al. Impact of genital warts on health related quality of life in men and women in mainland China: a multicenter hospital-based cross-sectional study. *BMC Public Health*. 2012;12(1):153.

- 
- 1  
2  
3  
4  
5  
6 18 Vilata JJ, Varela JA, Olmos L, *et al.* Validation and clinical use of the CECA, a disease-  
7 specific quality of life questionnaire for patients with anogenital condylomata acuminata.  
8 Acta dermato-venereologica. 2008;88(3):257-62.  
9  
10  
11  
12  
13 19 Wang KL, Jeng CJ, Yang YC, *et al.* The psychological impact of illness among women  
14 experiencing human papillomavirus-related illness or screening interventions. J  
15 Psychosomatic Obstet Gynecol. 2010;31(1):16-23.  
16  
17  
18  
19  
20 20 Pirotta M, Stein AN, Conway EL, *et al.* Genital warts incidence and healthcare resource  
21 utilisation in Australia. Sex Transm Infect. 2010;86:181-6.  
22  
23  
24  
25 21 Kang HS, Moneyham L. Attitudes toward and intention to receive the human papilloma virus  
26 (HPV) vaccination and intention to use condoms among female Korean college students.  
27 Vaccine. 2010;28(3):811-16.  
28  
29  
30  
31  
32 22 Kim YT. Current status of cervical cancer and HPV infection in Korea. J Gynecol Oncol.  
33 2009;20(1):1-7.  
34  
35  
36  
37  
38 23 Kim HW. Knowledge about human papillomavirus (HPV), and health beliefs and intention to  
39 recommend HPV vaccination for girls and boys among Korean health teachers. Vaccine.  
40 2012;30(36):5327-34.  
41  
42  
43  
44  
45 24 Pirotta M, Ung L, Stein A, *et al.* The psychosocial burden of human papillomavirus related  
46 disease and screening interventions. Sex Transm Infect. 2009;85(7):508-13.  
47  
48  
49  
50 25 Badia X, Colombo JA, Lara N, *et al.* Combination of qualitative and quantitative methods for  
51 developing a new health related quality of life measure for patients with anogenital warts.  
52 Health Qual Life Outcomes. 2005;3:24.  
53  
54  
55  
56  
57  
58  
59  
60



- 1  
2  
3  
4  
5  
6 26 EuroQol Group. EuroQol--a new facility for the measurement of health-related quality of life.  
7  
8 Health Policy. 1990;16:199-208.  
9  
10  
11 27 Tsuchiya A, Ikeda S, Ikegami N, et al. Estimating an EQ-5D population value set: the case of  
12  
13 Japan. Health Econ. 2002;11(4):341-53.  
14  
15  
16 28 Sakthong P, Charoervisuthiwongs R, Shabunthom R. A comparison of EQ-5D index scores  
17  
18 using the UK, US, and Japan preference weights in a Thai sample with type 2 diabetes.  
19  
20 Health Qual Life Outcomes. 2008;6:71.  
21  
22  
23 29 Wang KL, Shi JF, Kang DJ, et al. Chinese HPV study group. Impact of human  
24  
25 papillomavirus-related lesions on quality of life: a multicenter hospital-based study of  
26  
27 women in Mainland China. Int J Gynecol Cancer. 2011;21:182-8.  
28  
29  
30 30 McCaffery K, Forrest S, Waller J, Desai M, Szarewski A, Wardle J. Attitudes towards HPV  
31  
32 testing: a qualitative study of beliefs among Indian, Pakistani, African-Caribbean and white  
33  
34 British women in the UK. Br J Cancer. 2003;88(1):2003:42.  
35  
36  
37  
38 31 Mortensen GL, Larsen HK. The quality of life of patients with genital warts: a qualitative  
39  
40 study. BMC Public Health. 2010;10:113.  
41  
42  
43 32 Qi SZ, Wang SM, Shi JF, et al. Human papillomavirus-related psychosocial impact of  
44  
45 patients with genital warts in China: a hospital-based cross-sectional study. BMC Public  
46  
47 Health. 2014;14(1):739.  
48  
49  
50 33 Jeynes C, Chung MC, Challenor R. 'Shame on you'--the psychosocial impact of genital  
51  
52 warts. Int J STD AIDS. 2009;20(8):557-560.  
53  
54  
55  
56  
57  
58  
59  
60

- 
- 1  
2  
3  
4  
5  
6 34 Senecal M, Brisson M, Maunsell E, et al. Loss of quality of life associated with genital warts:  
7  
8 baseline analyses from a prospective study. *Sex Transm Infect.* 2011;87(3):209-15.  
9  
10  
11 35 Scarbrough Lefebvre C, Van Krieking G, Goncalves M, de Sanjose S. Appraisal of the  
12  
13 burden of genital warts from a healthcare and individual patient perspective. *Pub Health.*  
14  
15 2011;125(7):464-75.  
16  
17  
18 36 Woodhall S, Ramsey T, Cai C, et al. Estimation of the impact of genital warts on health-  
19  
20 related quality of life. *Sex Transm Infect.* 2008;84(3):161-6.  
21  
22  
23 37 Anhang R, Goodman A, Goldie SJ. HPV communication: review of existing research and  
24  
25 recommendations for patient education. *CA Cancer J Clin.* 2004;54(5):248-9.  
26  
27  
28 38 Sharma A, Méndez E, Yueh B, et al. Human papillomavirus-positive oral cavity and  
29  
30 oropharyngeal cancer patients do not have better quality-of-life trajectories. *Otolaryngol*  
31  
32 *Head Neck Surg.* 2012;146(5):739-45.  
33  
34  
35  
36  
37  
38  
39  
40  
41  
42  
43  
44  
45  
46  
47  
48  
49  
50  
51  
52  
53  
54  
55  
56  
57  
58  
59  
60

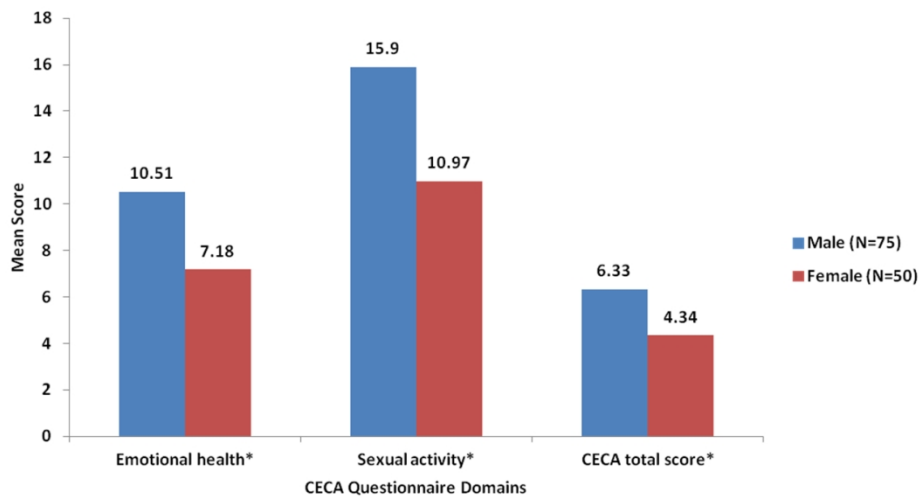

Figure 1. CECA Questionnaire Scores by Male and Female Patients with GW in South Korea / CECA=Cuestionario Específico para Condiloma Acuminado (in Spanish) – ‘Specific questionnaire for Condylomata Acuminata’; GW=genital warts

364x193mm (96 x 96 DPI)

## 1 APPENDIX

2 **Table A-1. Participating Physicians by Region in South Korea**

|               | <b>PCP<br/>(n=50)</b> | <b>DERM<br/>(n=35)</b> | <b>OB/GYN<br/>(n=65)</b> | <b>URO<br/>(n=50)</b> | <b>Overall<br/>(n=200)</b> |
|---------------|-----------------------|------------------------|--------------------------|-----------------------|----------------------------|
| <b>Region</b> |                       |                        |                          |                       |                            |
| Busan         | 6 (12.0%)             | 5 (14.3%)              | 9 (13.8%)                | 9 (18.0%)             | 29 (14.5%)                 |
| Daegu         | 3 (6.0%)              | 3 (8.6%)               | 8 (12.3%)                | 7 (14.0%)             | 21 (10.5%)                 |
| Daejeon       | 2 (4.0%)              | 2 (5.7%)               | 5 (7.7%)                 | 4 (8.0%)              | 13 (6.5%)                  |
| Gwangju       | 2 (4.0%)              | 3 (8.6%)               | 4 (6.2%)                 | 4 (8.0%)              | 13 (6.5%)                  |
| Seoul         | 37 (74.0%)            | 22 (62.9%)             | 39 (60.0%)               | 26 (52.0%)            | 124 (62.0%)                |
| Valid n       | 50                    | 35                     | 65                       | 50                    | 200                        |

3  
4 DERM=dermatologist; OBGYN=obstetrician/gynecologist; PCP=primary care physician; URO=urologist

6 **Table A-2. Target Number Of Clinics Within A Specialty Per City in South Korea**

| <b>City</b> | <b>OB/GYN</b> | <b>URO</b> | <b>DERM</b> | <b>PCP</b> | <b>Overall</b> |          |
|-------------|---------------|------------|-------------|------------|----------------|----------|
|             | <b>N</b>      | <b>N</b>   | <b>N</b>    | <b>N</b>   | <b>N</b>       | <b>%</b> |
| Seoul       | 37            | 24         | 20          | 31         | 112            | 60%      |
| Busan       | 9             | 8          | 4           | 8          | 29             | 15%      |
| Daegu       | 7             | 7          | 3           | 4          | 21             | 11%      |
| Kwangju     | 4             | 4          | 2           | 3          | 13             | 7%       |
| Daejeon     | 4             | 4          | 1           | 4          | 13             | 7%       |
| Total       | 61            | 47         | 30          | 50         | 188            | 100%     |

8 **Table A-3. HIP Questionnaire Scores by Female Patients and selected HPV-related**  
 9 **diseases in South Korea**

|                                        | HPV Disease (n=200) |                                      |                             |                    |                       |              |
|----------------------------------------|---------------------|--------------------------------------|-----------------------------|--------------------|-----------------------|--------------|
|                                        | Abnormal Pap (n=50) | Abnormal Pap and HPV positive (n=50) | Precancerous Lesions (n=50) | External GW (n=50) | No HPV Disease (n=50) | Overall      |
| <b>HPV Impact Profile total</b>        |                     |                                      |                             |                    |                       |              |
| Mean                                   | 50.54               | 52.59                                | 50.69                       | 59.61              | 44.98                 | 51.69        |
| 95% CI                                 | (47.0;              | (49.4;                               | (47.6; 53.8)                | (57.2;             | (41.4;                | (50.2; 53.2) |
| Valid n                                | 50                  | 50                                   | 49                          | 50                 | 50                    | 249          |
| <b>HPV Impact Profile total</b>        |                     |                                      |                             |                    |                       |              |
| No or little impact                    | 9 (18.0%)           | 7 (14.0%)                            | 7 (14.0%)                   |                    | 17                    | 40 (16.0%)   |
| Moderate impact                        | 40 (80.0%)          | 41 (82.0%)                           | 42 (84.0%)                  | 45 (90.0%)         | 30                    | 198          |
| Heavy psychological                    | 1 (2.0%)            | 2 (4.0%)                             | 1 (2.0%)                    | 5 (10.0%)          | 3 (6.0%)              | 12 (4.8%)    |
| Valid n                                | 50                  | 50                                   | 50                          | 50                 | 50                    | 250          |
| <b>Worries and concerns</b>            |                     |                                      |                             |                    |                       |              |
| Mean                                   | 52.64               | 54.20                                | 54.73                       | 67.14              | 41.94                 | 54.18        |
| 95% CI                                 | (46.0;              | (48.2;                               | (49.3; 60.1)                | (61.8;             | (35.5;                | (51.4; 57.0) |
| Valid n                                | 50                  | 50                                   | 49                          | 50                 | 49                    | 248          |
| <b>Emotional impact</b>                |                     |                                      |                             |                    |                       |              |
| Mean                                   | 53.16               | 56.24                                | 54.37                       | 60.52              | 42.32                 | 53.32        |
| 95% CI                                 | (48.8;              | (51.2;                               | (49.6; 59.2)                | (56.3;             | (37.8;                | (51.2; 55.5) |
| Valid n                                | 50                  | 50                                   | 49                          | 50                 | 50                    | 249          |
| <b>Sexual impact</b>                   |                     |                                      |                             |                    |                       |              |
| Mean                                   | 49.30               | 48.85                                | 51.73                       | 53.30              | 49.80                 | 50.61        |
| 95% CI                                 | (45.7;              | (45.6;                               | (46.6; 56.9)                | (49.8;             | (45.3;                | (48.8; 52.4) |
| Valid n                                | 50                  | 48                                   | 49                          | 50                 | 49                    | 246          |
| <b>Self-Image</b>                      |                     |                                      |                             |                    |                       |              |
| Mean                                   | 46.85               | 49.25                                | 40.20                       | 54.20              | 45.17                 | 47.16        |
| 95% CI                                 | (43.1;              | (45.9;                               | (36.8; 43.6)                | (51.2;             | (41.4;                | (45.5; 48.8) |
| Valid n                                | 50                  | 50                                   | 49                          | 50                 | 50                    | 249          |
| <b>Partner issues and transmission</b> |                     |                                      |                             |                    |                       |              |
| Mean                                   | 55.42               | 57.73                                | 51.71                       | 70.07              | 47.23                 | 56.51        |
| 95% CI                                 | (50.0;              | (52.5;                               | (45.8; 57.6)                | (66.4;             | (41.8;                | (54.1; 59.0) |
| Valid n                                | 48                  | 47                                   | 43                          | 47                 | 47                    | 232          |
| <b>Interactions with doctors</b>       |                     |                                      |                             |                    |                       |              |
| Mean                                   | 42.47               | 47.33                                | 46.26                       | 50.93              | 45.73                 | 46.55        |
| 95% CI                                 | (38.7;              | (43.5;                               | (42.4; 50.1)                | (46.8;             | (40.8;                | (44.7; 48.4) |
| Valid n                                | 50                  | 50                                   | 49                          | 50                 | 50                    | 249          |
| <b>Control - life impact</b>           |                     |                                      |                             |                    |                       |              |
| Mean                                   | 49.33               | 49.73                                | 49.66                       | 45.20              | 52.37                 | 49.26        |
| 95% CI                                 | (45.5;              | (46.3;                               | (45.9; 53.4)                | (40.7;             | (49.2;                | (47.6; 50.9) |

|         | HPV Disease (n=200) |                                      |                             |                    |                       |         |
|---------|---------------------|--------------------------------------|-----------------------------|--------------------|-----------------------|---------|
|         | Abnormal Pap (n=50) | Abnormal Pap and HPV positive (n=50) | Precancerous Lesions (n=50) | External GW (n=50) | No HPV Disease (n=50) | Overall |
| Valid n | 50                  | 50                                   | 49                          | 50                 | 50                    | 249     |

10  
11 HPV=human papillomavirus; HIP=HPV impact profile; Pap=Papanicolaou test; GW=genital warts; CI=confidence  
12 interval  
13  
14

15 **Table A-4. EQ-5D Descriptive System Results by Female Patients and selected HPV-related Diseases in South Korea**  
 16 **(excluding control group)**

|                                                          | <b>Abnormal Pap Result (n=50)</b> | <b>Abnormal Pap Result and HPV positive (n=50)</b> | <b>Precancerous Lesions (n=50)</b> | <b>External GW (n=50)</b> | <b>Overall</b> | <b>P-value</b> |
|----------------------------------------------------------|-----------------------------------|----------------------------------------------------|------------------------------------|---------------------------|----------------|----------------|
| <b>Mobility</b>                                          |                                   |                                                    |                                    |                           |                |                |
| I have no problems walking about                         | 49 (98.0%)                        | 50 (100.0%)                                        | 47 (95.9%)                         | 47 (94.0%)                | 193 (97.0%)    | 0.3403         |
| I have some problems walking about                       | 1 (2.0%)                          |                                                    | 2 (4.1%)                           | 3 (6.0%)                  | 6 (3.0%)       |                |
| Valid n                                                  | 50                                | 50                                                 | 49                                 | 50                        | 199            |                |
| <b>Self-Care</b>                                         |                                   |                                                    |                                    |                           |                |                |
| I have no problems with self-care                        | 50 (100.0%)                       | 50 (100.0%)                                        | 48 (98.0%)                         | 49 (98.0%)                | 197 (99.0%)    | 0.6193         |
| I have some problems washing or dressing myself          |                                   |                                                    |                                    | 1 (2.0%)                  | 1 (0.5%)       |                |
| I am unable to wash or dress myself                      |                                   |                                                    | 1 (2.0%)                           |                           | 1 (0.5%)       |                |
| Valid n                                                  | 50                                | 50                                                 | 49                                 | 50                        | 199            |                |
| <b>Usual Activities</b>                                  |                                   |                                                    |                                    |                           |                |                |
| I have no problems with performing my usual activities   | 50 (100.0%)                       | 50 (100.0%)                                        | 47 (95.9%)                         | 49 (98.0%)                | 196 (98.5%)    | 0.1960         |
| I have some problems with performing my usual activities |                                   |                                                    | 2 (4.1%)                           | 1 (2.0%)                  | 3 (1.5%)       |                |
| Valid n                                                  | 50                                | 50                                                 | 49                                 | 50                        | 199            |                |
| <b>Pain - Discomfort</b>                                 |                                   |                                                    |                                    |                           |                |                |
| I have no pain or discomfort                             | 46 (92.0%)                        | 43 (86.0%)                                         | 42 (85.7%)                         | 34 (68.0%)                | 165 (82.9%)    | 0.0146         |
| I have moderate pain or discomfort                       | 4 (8.0%)                          | 7 (14.0%)                                          | 7 (14.3%)                          | 16 (32.0%)                | 34 (17.1%)     |                |
| Valid n                                                  | 50                                | 50                                                 | 49                                 | 50                        | 199            |                |
| <b>Anxiety - Depression</b>                              |                                   |                                                    |                                    |                           |                |                |
| I am not anxious or depressed                            | 40 (80.0%)                        | 38 (76.0%)                                         | 32 (65.3%)                         | 26 (52.0%)                | 136 (68.3%)    | 0.0387         |
| I am moderately anxious or depressed                     | 10 (20.0%)                        | 10 (20.0%)                                         | 15 (30.6%)                         | 21 (42.0%)                | 56 (28.1%)     |                |
| I am extremely anxious or depressed                      |                                   | 2 (4.0%)                                           | 2 (4.1%)                           | 3 (6.0%)                  | 7 (3.5%)       |                |
| Valid n                                                  | 50                                | 50                                                 | 49                                 | 50                        | 199            |                |

17 EQ-5D=EuroQol-5 Dimension; HPV=human papillomavirus; Pap=Papanicolaou test; GW=genital warts

**Table A-5. EQ-5D VAS and Utility Scores for Female Patients by selected HPV-related Diseases in South Korea (excluding control group)**

|                       | <b>Abnormal Pap (n=50)</b> | <b>Abnormal Pap and HPV positive (n=50)</b> | <b>Precancerous Lesions (n=50)</b> | <b>External GW (n=50)</b> | <b>Overall</b> | <b>p-value</b> |
|-----------------------|----------------------------|---------------------------------------------|------------------------------------|---------------------------|----------------|----------------|
| <b>VAS (EQ-5D)</b>    |                            |                                             |                                    |                           |                |                |
| Mean                  | 74.51                      | 73.78                                       | 71.50                              | 68.92                     | 72.18          | <0.0001        |
| 95% CI                | (69.8; 79.2)               | (70.0; 77.6)                                | (66.5; 76.5)                       | (64.2; 73.6)              | (69.9; 74.4)   |                |
| Valid n               | 49                         | 49                                          | 42                                 | 50                        | 190            |                |
| <b>Utility values</b> |                            |                                             |                                    |                           |                |                |
| Mean                  | 0.94                       | 0.93                                        | 0.89                               | 0.85                      | 0.90           | <0.0001        |
| 95% CI                | (0.9; 1.0)                 | (0.9; 1.0)                                  | (0.9; 0.9)                         | (0.8; 0.9)                | (0.9; 0.9)     |                |
| Valid n               | 50                         | 50                                          | 49                                 | 50                        | 199            |                |

EQ-5D=EuroQol-5 Dimension; VAS=visual analog scores; HPV=human papillomavirus;

Pap=Papanicolaou test; GW=genital warts; CI=confidence interval



## STROBE Statement—checklist of items that should be included in reports of observational studies

|                              | Item No | Recommendation                                                                                                                                                                                                                                                                                                                                                                                                                                                                                                                                                                                                                                                                                                                                                          |
|------------------------------|---------|-------------------------------------------------------------------------------------------------------------------------------------------------------------------------------------------------------------------------------------------------------------------------------------------------------------------------------------------------------------------------------------------------------------------------------------------------------------------------------------------------------------------------------------------------------------------------------------------------------------------------------------------------------------------------------------------------------------------------------------------------------------------------|
| <b>Title and abstract</b>    | 1       | (a) Indicate the study's design with a commonly used term in the title or the abstract – <b>Pg. 3</b><br>(b) Provide in the abstract an informative and balanced summary of what was done and what was found – <b>Pg. 3</b>                                                                                                                                                                                                                                                                                                                                                                                                                                                                                                                                             |
| <b>Introduction</b>          |         |                                                                                                                                                                                                                                                                                                                                                                                                                                                                                                                                                                                                                                                                                                                                                                         |
| Background/rationale         | 2       | Explain the scientific background and rationale for the investigation being reported – <b>Pg. 5-6</b>                                                                                                                                                                                                                                                                                                                                                                                                                                                                                                                                                                                                                                                                   |
| Objectives                   | 3       | State specific objectives, including any prespecified hypotheses – <b>Pg. 6</b>                                                                                                                                                                                                                                                                                                                                                                                                                                                                                                                                                                                                                                                                                         |
| <b>Methods</b>               |         |                                                                                                                                                                                                                                                                                                                                                                                                                                                                                                                                                                                                                                                                                                                                                                         |
| Study design                 | 4       | Present key elements of study design early in the paper – <b>Pg. 7-11</b>                                                                                                                                                                                                                                                                                                                                                                                                                                                                                                                                                                                                                                                                                               |
| Setting                      | 5       | Describe the setting, locations, and relevant dates, including periods of recruitment, exposure, follow-up, and data collection – <b>Pgs. 7-11</b>                                                                                                                                                                                                                                                                                                                                                                                                                                                                                                                                                                                                                      |
| Participants                 | 6       | (a) <i>Cohort study</i> —Give the eligibility criteria, and the sources and methods of selection of participants. Describe methods of follow-up – <b>N/A</b><br><i>Case-control study</i> —Give the eligibility criteria, and the sources and methods of case ascertainment and control selection. Give the rationale for the choice of cases and controls – <b>N/A</b><br><i>Cross-sectional study</i> —Give the eligibility criteria, and the sources and methods of selection of participants – <b>Pgs. 7-11</b><br>(b) <i>Cohort study</i> —For matched studies, give matching criteria and number of exposed and unexposed – <b>N/A</b><br><i>Case-control study</i> —For matched studies, give matching criteria and the number of controls per case – <b>N/A</b> |
| Variables                    | 7       | Clearly define all outcomes, exposures, predictors, potential confounders, and effect modifiers. Give diagnostic criteria, if applicable – <b>Pgs. 10-11</b>                                                                                                                                                                                                                                                                                                                                                                                                                                                                                                                                                                                                            |
| Data sources/<br>measurement | 8*      | For each variable of interest, give sources of data and details of methods of assessment (measurement). Describe comparability of assessment methods if there is more than one group – <b>Pgs. 10-11</b>                                                                                                                                                                                                                                                                                                                                                                                                                                                                                                                                                                |
| Bias                         | 9       | Describe any efforts to address potential sources of bias – <b>Pg. 22</b>                                                                                                                                                                                                                                                                                                                                                                                                                                                                                                                                                                                                                                                                                               |
| Study size                   | 10      | Explain how the study size was arrived at – <b>Pg. 7-11</b>                                                                                                                                                                                                                                                                                                                                                                                                                                                                                                                                                                                                                                                                                                             |
| Quantitative variables       | 11      | Explain how quantitative variables were handled in the analyses. If applicable, describe which groupings were chosen and why – <b>Pg. 9-11</b>                                                                                                                                                                                                                                                                                                                                                                                                                                                                                                                                                                                                                          |
| Statistical methods          | 12      | (a) Describe all statistical methods, including those used to control for confounding – <b>Pgs. 10-11</b><br>(b) Describe any methods used to examine subgroups and interactions – <b>Pg. 8-10</b><br>(c) Explain how missing data were addressed – <b>N/A</b><br>(d) <i>Cohort study</i> —If applicable, explain how loss to follow-up was addressed – <b>N/A</b><br><i>Case-control study</i> —If applicable, explain how matching of cases and controls was addressed – <b>N/A</b><br><i>Cross-sectional study</i> —If applicable, describe analytical methods taking account of sampling strategy <b>Pgs. 7-11</b><br>(e) Describe any sensitivity analyses – <b>N/A</b>                                                                                            |

Continued on next page

**Results**

|                  |     |                                                                                                                                                                                                                                                                                                                                                                                                                                                       |
|------------------|-----|-------------------------------------------------------------------------------------------------------------------------------------------------------------------------------------------------------------------------------------------------------------------------------------------------------------------------------------------------------------------------------------------------------------------------------------------------------|
| Participants     | 13* | (a) Report numbers of individuals at each stage of study—eg numbers potentially eligible, examined for eligibility, confirmed eligible, included in the study, completing follow-up, and analysed – <b>Pgs. 11 - 12</b><br>(b) Give reasons for non-participation at each stage – <b>Pgs. 7-9</b><br>(c) Consider use of a flow diagram – <b>N/A</b>                                                                                                  |
| Descriptive data | 14* | (a) Give characteristics of study participants (eg, demographic, clinical, social) and information on exposures and potential confounders – <b>Pgs. 7-9, 11-13</b><br>(b) Indicate number of participants with missing data for each variable of interest – <b>N/A</b><br>(c) <i>Cohort study</i> —Summarise follow-up time (eg, average and total amount) – <b>N/A</b>                                                                               |
| Outcome data     | 15* | <i>Cohort study</i> —Report numbers of outcome events or summary measures over time – <b>N/A</b><br><i>Case-control study</i> —Report numbers in each exposure category, or summary measures of exposure – <b>N/A</b><br><i>Cross-sectional study</i> —Report numbers of outcome events or summary measures – <b>Pgs. 15-20</b>                                                                                                                       |
| Main results     | 16  | (a) Give unadjusted estimates and, if applicable, confounder-adjusted estimates and their precision (eg, 95% confidence interval). Make clear which confounders were adjusted for and why they were included – <b>N/A</b><br>(b) Report category boundaries when continuous variables were categorized – <b>N/A</b><br>(c) If relevant, consider translating estimates of relative risk into absolute risk for a meaningful time period. – <b>N/A</b> |
| Other analyses   | 17  | Report other analyses done—eg analyses of subgroups and interactions, and sensitivity analyses – <b>N/A</b>                                                                                                                                                                                                                                                                                                                                           |

**Discussion**

|                  |    |                                                                                                                                                                                                |
|------------------|----|------------------------------------------------------------------------------------------------------------------------------------------------------------------------------------------------|
| Key results      | 18 | Summarise key results with reference to study objectives – <b>Pgs. 11-20</b>                                                                                                                   |
| Limitations      | 19 | Discuss limitations of the study, taking into account sources of potential bias or imprecision. Discuss both direction and magnitude of any potential bias – <b>Pg. 22-23</b>                  |
| Interpretation   | 20 | Give a cautious overall interpretation of results considering objectives, limitations, multiplicity of analyses, results from similar studies, and other relevant evidence – <b>Pgs. 20-22</b> |
| Generalisability | 21 | Discuss the generalisability (external validity) of the study results – <b>Pgs. 20-22</b>                                                                                                      |

**Other information**

|         |    |                                                                                                                                                                              |
|---------|----|------------------------------------------------------------------------------------------------------------------------------------------------------------------------------|
| Funding | 22 | Give the source of funding and the role of the funders for the present study and, if applicable, for the original study on which the present article is based – <b>Pg. 1</b> |
|---------|----|------------------------------------------------------------------------------------------------------------------------------------------------------------------------------|

\*Give information separately for cases and controls in case-control studies and, if applicable, for exposed and unexposed groups in cohort and cross-sectional studies.

**Note:** An Explanation and Elaboration article discusses each checklist item and gives methodological background and published examples of transparent reporting. The STROBE checklist is best used in conjunction with this article (freely available on the Web sites of PLoS Medicine at <http://www.plosmedicine.org/>, Annals of Internal Medicine at <http://www.annals.org/>, and Epidemiology at <http://www.epidem.com/>). Information on the STROBE Initiative is available at [www.strobe-statement.org](http://www.strobe-statement.org).

# BMJ Open

## A Cross-sectional Study Estimating the Psychosocial Impact of Genital Warts and Other Anogenital Diseases in South Korea

|                                 |                                                                                                                                                                                                                                                                                                                                                                                                                                                                                                                                                                                                        |
|---------------------------------|--------------------------------------------------------------------------------------------------------------------------------------------------------------------------------------------------------------------------------------------------------------------------------------------------------------------------------------------------------------------------------------------------------------------------------------------------------------------------------------------------------------------------------------------------------------------------------------------------------|
| Journal:                        | <i>BMJ Open</i>                                                                                                                                                                                                                                                                                                                                                                                                                                                                                                                                                                                        |
| Manuscript ID                   | bmjopen-2018-025035.R1                                                                                                                                                                                                                                                                                                                                                                                                                                                                                                                                                                                 |
| Article Type:                   | Research                                                                                                                                                                                                                                                                                                                                                                                                                                                                                                                                                                                               |
| Date Submitted by the Author:   | 04-Dec-2018                                                                                                                                                                                                                                                                                                                                                                                                                                                                                                                                                                                            |
| Complete List of Authors:       | Lee , Taek Sang ; SMG-SNU Boramae Medical Center, Department of Obstetrics and Gynecology<br>Kothari-Talwar , Smita ; Merck and Co Inc<br>Singhal, Puneet ; Merck and Co Inc<br>Yee, Karen ; Cubist Pharmaceuticals Inc,<br>Kulkarni , Amit ; Merck and Co Inc,<br>Lara, Nuria; IMS Health Barcelona<br>Roset , Montserrat ; IMS Health Economics and Outcomes Research,<br>Giuliano, Anna; Lee Moffitt Cancer Center and Research Institute<br>Garland, Suzanne; The Royal Women's Hospital, Microbiology and Infectious Diseases Department<br>Ju, Woong; Ewha Womans University, School of Medicine |
| <b>Primary Subject Heading</b>: | Sexual health                                                                                                                                                                                                                                                                                                                                                                                                                                                                                                                                                                                          |
| Secondary Subject Heading:      | Dermatology, Sexual health, Urology, Epidemiology                                                                                                                                                                                                                                                                                                                                                                                                                                                                                                                                                      |
| Keywords:                       | genital warts, psychosocial impact, South Korea                                                                                                                                                                                                                                                                                                                                                                                                                                                                                                                                                        |
|                                 |                                                                                                                                                                                                                                                                                                                                                                                                                                                                                                                                                                                                        |

SCHOLARONE™  
Manuscripts

Taek Sang Lee

1

1  
2  
3  
4  
5  
6  
7  
8  
9  
10  
11  
12  
13  
14  
15  
16  
17  
18  
19  
20  
21  
22  
23  
24  
25  
26  
27  
28  
29  
30  
31  
32  
33  
34  
35  
36  
37  
38  
39  
40  
41  
42  
43  
44  
45  
46  
47  
48  
49  
50  
51  
52  
53  
54  
55  
56  
57  
58  
59  
60

1 **A Cross-sectional Study Estimating the Psychosocial Impact of Genital Warts and Other**  
2 **Anogenital Diseases in South Korea**

3 **Short Title:** GW: Psychosocial Impact in South Korea

4 **Authors:** Taek Sang Lee PhD, MD<sup>1</sup>, Smita Kothari-Talwar, PhD<sup>2</sup>, Puneet K. Singhal MS, PhD<sup>2</sup>,  
5 Karen Yee PhD<sup>2</sup>, Amit Kulkarni MS, PhD<sup>2</sup>, Nuria Lara MSc, MD<sup>3</sup>, Montserrat Roset<sup>3</sup>, Anna R.  
6 Giuliano PhD<sup>4</sup>, Suzanne M. Garland PhD, MD<sup>5</sup>, Woong Ju MPH, PhD, MD<sup>6\*</sup>

7 <sup>1</sup> Department of Obstetrics and Gynecology, SMG-SNU Boramae Medical Center, Seoul, Korea

8 <sup>2</sup> Merck & Co. Inc., Kenilworth, NJ, USA

9 <sup>3</sup> IMS Health, Barcelona, Spain

10 <sup>4</sup> Center for Infection Research in Cancer (CIRC) at Moffitt Cancer Center, Tampa Florida, USA

11 <sup>5</sup> Royal Women's Hospital, Melbourne, Australia

12 <sup>6</sup> Ewha Womans University, School of Medicine, Seoul, South Korea

13 **\*Corresponding Author:**

14 Woong Ju, MPH, PhD, MD

15 Professor, Ewha Womans University, School of Medicine

16 Postal Address: 1071, Anyangcheon-ro, Seoul, South Korea

17 Email: goodmorning@ewha.ac.kr

Telephone Number: 82-2-2650-5890

FAX: 82-2-2648-5890

14 **Keywords:** Genital Warts, Psychosocial impact, South Korea

15 **Acknowledgements:** The authors acknowledge Furaha Kariburyo, MPH, of STATinMED  
16 Research, for medical writing assistance.

## 18 Abstract

19 **Objectives:** To estimate self-reported human papillomavirus (HPV) disease-related psychosocial  
20 impact among male and female patients in South Korea.

21 **Design:** In this multi-center cross-sectional study, psychosocial impacts were estimated using a  
22 one-time survey capturing HPV Impact Profile (HIP) results, *Cuestionario Específico para*  
23 *Condiloma Acuminado* (CECA; in Spanish) – ‘Specific questionnaire for Condylomata  
24 Acuminata,’ and the EuroQol-5 Dimension (EQ-5D) surveys. T-tests or Mann-Whitney U tests  
25 were used for continuous comparisons; chi-square or Fisher Exact tests were applied for  
26 categorical comparisons.

27 **Setting:** 5,098 clinics throughout Seoul, Busan, Daegu, Kwangju, and Daejeon (South Korea).

28 **Participants:** Patients with and without GW (males) and selected HPV diseases (females) visiting  
29 primary care physicians, obstetricians/gynecologists, urologists, and dermatologists with 2-30  
30 years’ experience.

31 **Results:** Of 150 male and 250 female patients, HIP scores showed 85.3% of male patients with  
32 genital warts (GW) and 32.0% without reported moderate psychological impact ( $p<0.0001$ ). In  
33 categorized total scores, 88.5% of female patients with and 66.0% without selected HPV-related  
34 diseases reported moderate or high psychological impacts ( $p=0.0004$ ). In the CECA questionnaire,  
35 male patients had mean (standard deviation) scores of 10.51 (3.79) in ‘emotional health’, and 15.90  
36 (6.13) in ‘sexual activity’. Female patients with GW reported lower scores in both dimensions  
37 with mean scores of 7.18 (4.17) in ‘emotional health’ and 10.97 (5.80) in ‘sexual activity’  
38 ( $p<0.0001$ ), indicating worse health-related quality of life (HRQOL). For the EQ-5D, male

1  
2  
3  
4 39 patients with GW reported lower mean visual analog scale scores than those without (75.1 vs.  
5  
6 81.13,  $p < 0.0135$ ). Mean VAS score and utility values were lower for females with HPV-related  
7  
8 40 diseases than those without (72.18 vs. 76.86 and 0.90 vs. 0.94, respectively).  
9  
10 41

11 42 **Conclusion:** In South Korea, GW in men and HPV-related diseases in women negatively impact  
12  
13 43 patient well-being and HRQOL scores. Among women, those with GW suffered a greater  
14  
15 44 psychosocial impact than those with other selected HPV-related diseases.  
16  
17  
18

19 45 **Keywords:** genital warts, psychosocial impact, South Korea  
20  
21

22 46 **Article Summary:**  
23  
24

25 47 **Strengths and limitations of this study**  
26  
27

- 28 48 • Cross-sectional HIP, CECA, and EQ-5D surveys completed by patients were logged by  
29  
30 49 multiple physician specialties and in different geographic regions in South Korea.  
31  
32  
33 50 • Patients were stratified into male and female groups and further stratified by GW or HPV-  
34  
35 51 related disease status (with/without)  
36  
37  
38 52 • Patient survey results were used to assess psychosocial burden (general health, sexual  
39  
40 53 activity, cervical cancer screening behavior, psychosocial impact, GW experience, socio-  
41  
42 54 demographic information).  
43  
44  
45  
46 55 • Selection bias may have occurred due to the convenience sample approach used.  
47  
48  
49  
50  
51  
52  
53  
54  
55  
56  
57  
58  
59  
60

## 56 Introduction

57 Human papillomaviruses (HPVs) are common sexually transmitted viral infections in  
58 young people [1,2,3]. Of the 130 HPV types that have been identified and sequenced,  
59 approximately 40 have a predilection for the anogenital region. Although they are readily  
60 transmitted, and most are transient, they can cause disease that manifests as genital warts (GW)  
61 and squamous intraepithelial lesions on cervical Pap screenings, and high-risk types are the cause  
62 of anogenital cancers. HPV types 6 and 11 alone are estimated to cause most viral sexually  
63 transmitted infections [4,5]. GW can be exophytic, confluent, cauliflower-like tumors, and their  
64 typical morphologies can aid in diagnosis, although they can also be flat or atypical [6,7,8].

65 To date, few studies have focused on HPV prevalence and related disease among men and  
66 women residing in South Korea. The study, conducted among South Korean women, observed a  
67 low-risk HPV prevalence of 10.3% among those ages 20-29 years and 3.2% among women ages  
68 50-59 years [9]. While another study observed an overall GW prevalence in South Korea of 0.7%  
69 [10].

70 Studies have shown that GW infection can have a tremendous psychosocial impact on  
71 patients [11, 12, 13]. Some of the highest rates of GW occur in adolescents and young adults at a  
72 time when individuals are particularly impacted by the stigma associated with a visible sexually  
73 transmitted infection (STI). Several key emotions have been identified in GW patients including  
74 anger, disgust, shame, embarrassment, depression, anxiety, worry and a feeling of being less  
75 desirable, which all can have an impact on sexual relationships [14]. In 1998, research by Maw *et*  
76 *al.* found that up to two-thirds of male and female GW patients made lifestyle changes that  
77 impacted their relationships [15].

1  
2  
3  
4 78 Recognizing the profound impact that GW and other HPV-related diseases can have on  
5  
6  
7 79 patients has led to the creation of tools to assess the burden of these conditions, including the self-  
8  
9 80 administered HPV Impact Profile (HIP) as developed and validated by Mast *et al.*, the European  
10  
11 81 quality of life (EurQol)-5 dimension (EQ-5D), and the *Cuestionario Especifico para Condiloma*  
12  
13 82 *Acuminado* (CECA; in Spanish) – ‘Specific questionnaire for Condylomata Acuminata’. These are  
14  
15 83 standardized and commonly used instruments to measure health-related quality of life (HRQoL).  
16  
17 84 [16,17,18]. The HIP was used in a study of Taiwanese women, and results showed that an  
18  
19 85 abnormal Papanicolaou (Pap) result (including abnormal results and any grade of cervical cancer)  
20  
21 86 has a significant psychosocial impact, and a greater impact for those diagnosed with GW [19].  
22  
23 87 Pirota *et al.* also found a significant psychosocial impact on Australian women screened for and  
24  
25 88 diagnosed with an HPV-related disease [20]. These women were found to be more likely to have  
26  
27 89 their social lives disrupted, even more so than those being treated for high-grade cervical dysplasia  
28  
29 90 [20].  
30  
31  
32  
33

34 91 Literature on the psychosocial impact of GW in South Korea is scarce. Most available  
35  
36 92 research in the country focuses on cervical cancer, HPV knowledge and attitudes, or intention  
37  
38 93 toward HPV vaccination [21,22,23]. The aim of this study was to evaluate the psychosocial burden  
39  
40 94 of HPV-related diseases, including GW, in South Korea among male and female patients ages 20-  
41  
42 95 60 years.  
43  
44  
45  
46  
47  
48  
49  
50  
51  
52  
53  
54  
55  
56  
57  
58  
59  
60



## 97 **Materials and Methods**

### 98 *Study Design*

99 A cross-sectional study was conducted from July 28, 2011 to November 30, 2011 in five  
100 major cities of South Korea: Seoul, Busan, Daegu, Kwangju, and Daejeon (Appendix Table A-1).  
101 The study targeted clinics where cervical cytology screenings, including GW screenings, were  
102 performed, and where men and women were seen for HPV-related diseases. The study was  
103 approved by the National Evidence-based Health Care Collaborating Agency (NECA), Borame  
104 University Hospital, the SMG-SNU University Medical Center, and the Ewha University  
105 Mokdong Hospital ethics committees. No confidential patient-level data was collected for this  
106 study.

### 107 *Inclusion and Exclusion Criteria*

#### 108 Participating Physicians

109 Participating physicians were identified through an Intercontinental Marketing Services  
110 (IMS) database, a database of nationwide clinics published by Health Insurance Review and  
111 Assessment (HIRA). This database includes information pertaining to 5,098 clinics in the five  
112 targeted cities (Appendix Table A-2). All data collection for this study was conducted in the office  
113 or clinic of the participating physicians.

### 114 Patient and Public Involvement

115 Participant physicians invited their patients for study participation as part of routine practice by  
116 asking their patients if they were willing to participate in a one-time survey and giving them a

1  
2  
3  
4 117 patient informed consent form with a short description of the survey. The physician provided  
5  
6 118 verification on the survey regarding to which group the patient belonged (GW or control group)  
7  
8  
9 119 and administered the survey in the physician's office. Once the survey was completed, the patient's  
10  
11 120 survey was placed in a sealed envelope and left at the physician's office to be sent or picked up by  
12  
13 121 a research coordinator. Patients were not involved in the recruitment to and conduct of the study.  
14  
15  
16 122 Physicians were asked to read the corresponding questions to the patients to avoid any  
17  
18 123 misinterpretation of questions. The results will not be disseminated to study participants. The  
19  
20 124 current study was not a randomized controlled trial.  
21  
22

### 23 24 125 Female Patients

25  
26  
27 126 Female patients were included in the study if they were between the ages of 20 and 60  
28  
29 127 years, experienced an HPV-related event within the past 3 months, were in good self-reported  
30  
31 128 health, and belonged to one of the following categories: a) Abnormal Pap test result with no  
32  
33 129 definitive histology, conforming to the Bethesda Category-2001 category of squamous or  
34  
35 130 glandular cell abnormality (for example: atypical cells of undetermined significance [ASCUS],  
36  
37 131 atypical glandular cells of undetermined significance [AGUS], low-grade squamous intraepithelial  
38  
39 132 lesion [LSIL] or high-grade squamous intraepithelial lesion [HSIL]) and no previous high-risk  
40  
41 133 HPV test performed; b) receipt of positive high-risk HPV DNA test results after an abnormal Pap  
42  
43 134 test, as defined in the previous category; c) diagnosis of external GW or treatment for recurrences;  
44  
45 135 d) histological diagnosis of HPV-related cervical dysplasia cervical lesion (eg, CIN1, CIN2, CIN  
46  
47  
48 136 3); e) normal Pap result with no abnormal Pap test or definitive therapy within the past year; or f)  
49  
50  
51 137 two or more of the above conditions (not including GW patients) were categorized in the upper  
52  
53  
54 138 level of disease. To enable categorizing of women into discreet disease groups of CIN versus GW,  
55  
56  
57  
58  
59  
60

1  
2  
3  
4 139 female patients were excluded from the study if they were diagnosed with GW and had any of the  
5  
6  
7 140 following: precancerous cervical lesions, abnormal Pap and HPV-positive, or abnormal Pap test  
8  
9 141 results.

10  
11  
12 142 The control group was selected from the same clinic as the case group. Physicians provided  
13  
14 143 verification on the survey regarding patient groups (GW or control group) and gave them the  
15  
16 144 survey to complete in the physician's office. The physician sample was divided across primary  
17  
18 145 care physicians (general practitioners and internal medicine), obstetrics/gynecologists, urologists,  
19  
20 146 and dermatologists. The control group consisted of patients who have never had GW or received  
21  
22 147 treatment for it or had surgery or therapy in the genital area and included all other patients from a  
23  
24 148 physician's practice or clinic.

#### 25 26 27 28 29 149 Male Patients

30  
31  
32 150 Male patients were included in the study if they were between ages 20 and 60 years, in  
33  
34 151 good self-reported physical health, and belonged to one of the following categories: a) newly  
35  
36 152 diagnosed or existing external GW within the past 3 months of study recruitment; and b) patients  
37  
38 153 who had never been diagnosed with GW, prescribed GW treatment or had surgery or therapy in  
39  
40 154 the genital area.

41  
42  
43 155 Male and female patients were excluded from the study if they: a) had presence of any  
44  
45 156 other concurrent/active STI; b) were concurrently enrolled in clinical studies of investigational  
46  
47 157 agents; c) had a history of known prior or recent (within 1 year of the enrollment date) HPV  
48  
49 158 vaccination; d) had ongoing alcohol or drug abuse; e) were unable to give informed consent; or f)  
50  
51 159 had presence of any condition, which in the opinion of the investigator could interfere with the  
52  
53 160 evaluation of the study objectives.

1  
2  
3  
4 161 *Survey Instruments*  
5

6  
7 162 To measure the psychosocial burden (general health, sexual activity, cervical cancer  
8  
9 163 screening behavior, psychosocial impact, GW experience, socio-demographic information),  
10  
11 164 participants completed the three validated questionnaires; HIP (HPV Impact Profile), CECA  
12  
13 165 (*Cuestionario Especifico para Condiloma Acuminado* in Spanish– ‘Specific questionnaire for  
14  
15 166 Condylomata Acuminata’) and EQ-5D (EuroQol-5 Dimension) surveys, which were translated to  
16  
17 167 the Korean language and culturally pre-tested. Questionnaires were administered by the  
18  
19 168 participating physician after patients were diagnosed with HPV-related disease. A pilot test was  
20  
21 169 conducted using a small sample of physicians representing all four types of study physicians (two  
22  
23 170 per specialty, eight total). This was to ensure that all survey questions and exercises were  
24  
25 171 understood by respondents, and included culturally appropriate information.  
26  
27  
28

29  
30 172 HIP is a validated, 29-item self-administered questionnaire, designed to measure the  
31  
32 173 psychosocial impact of HPV-related health conditions in women [15]. The response for each item  
33  
34 174 ranges from 0 (lowest impact) to 10 points (highest impact). Items in the HIP survey were linearly  
35  
36 175 transformed to a 0-100 scale, with higher scores indicating better health. To create scale scores,  
37  
38 176 the mean was computed as the sum of the item scores over the number of items answered to  
39  
40 177 account for missing data. If more than 50% of items on the scale were missing, the score was not  
41  
42 178 computed. To create the total scale score, the mean was computed as the sum of all items over the  
43  
44 179 number of items answered on all scales [24]. The scale uses visual-spatial, numeric, and verbal  
45  
46 180 descriptive anchors to assess subject responses. This survey was adapted for use in male patients  
47  
48 181 in consultation with the original developer and has undergone cognitive testing in the United  
49  
50 182 States. Overall HIP scores are categorized as: no or little impact (mean HIP score <40), moderate  
51  
52 183 impact (between 40 and 70) and heavy psychological impact (mean HIP score >70) [19].  
53  
54  
55  
56  
57  
58  
59  
60

1  
2  
3  
4 184 The CECA survey includes 10 questions across two domains: emotional and sexual activity  
5  
6 185 [18,25]. CECA scores range from 0 (worst HRQoL) to 100 (best HRQoL). The EQ-5D survey is  
7  
8  
9 186 a two-part questionnaire, including descriptive and thermometer or visual analog scale (VAS), and  
10  
11 187 serves as a generic validated instrument for use as a measure of HRQoL [26]. VAS scores range  
12  
13 188 from 0 (death) to 100 (perfect health).

### 16 189 *Statistical Analysis*

19 190 All study outcomes were summarized descriptively. A descriptive analysis of the EQ-5D  
20  
21  
22 191 questionnaire was performed and numbers and percentages were provided. The Japanese version  
23  
24 192 of the EQ-5D Instrument was used in this study to estimate the utilities associated with EQ-5D  
25  
26 193 health status [27]. Japan was the first Asian country to develop its own preference EQ-5D weights  
27  
28 194 in 2002. The model was chosen to represent Asian preference weights [28]. VAS scores and utility  
29  
30 195 values were reported using the mean and standard deviation (SD) of the VAS score. VAS scores  
31  
32 196 ranged from 0 (worst HRQoL) to 100 (best HRQoL), and utility values from 0 (death) to 1 (perfect  
33  
34 197 health).

35  
36 198 Scores obtained for male and female patients were compared according to GW diagnosis  
37  
38 199 (in men) and HPV-related disease or GW diagnosis (in female patients). For continuous variables,  
39  
40  
41 200 comparisons were performed using the student t-test or Mann-Whitney U test. In addition, the  
42  
43 201 effect size (mean difference between the two means divided by the *pooled* standard deviation)  
44  
45 202 between groups has been calculated. For categorical variables, differences between the groups  
46  
47 203 were analyzed using the Chi-square or Fisher Exact test depending on patient distribution across  
48  
49 204 response categories.

205 CECA scores were reported using the mean, SD, and 95% confidence interval (CI). Student  
206 t-tests were performed to compare CECA scores according to gender.

## 207 **Results**

### 208 *Socio-demographic and Clinical Characteristics*

209 A total of 400 patients participated in the study. Table 1 shows age, marital status, race,  
210 highest educational degree, and sexual activity according to gender and HPV diagnosis status.  
211 Approximately half of patients included in the study were age 30-44 years (45.3%), 85.9% were  
212 in a committed relationship, 51.6% were married, 2.3% earned an education lower than grade 12  
213 (including vocational studies), 75.7% were employed, and 22.5% had no health insurance or other  
214 health care coverage.

215

216 **Table 1. Socio-demographic Characteristics and Sexual Activity of Survey Participants in**  
 217 **South Korea by Gender and GW Diagnosis (men) or HPV-related Diseases (women)**

|                                                            | Men (n=150)    |              | P-value | Women (n=250)       |                       | P-value | Overall     |
|------------------------------------------------------------|----------------|--------------|---------|---------------------|-----------------------|---------|-------------|
|                                                            | With GW (n=75) | No GW (n=75) |         | HPV Disease (n=200) | No HPV Disease (n=50) |         |             |
| <b>Age</b>                                                 |                |              |         |                     |                       |         |             |
| Mean                                                       | 34.07          | 37.32        | 0.0422  | 34.90               | 35.56                 | 0.6695  | 35.28       |
| SD                                                         | 9.48           | 9.96         |         | 9.63                | 10.32                 |         | 9.77        |
| <b>Age group</b>                                           |                |              |         |                     |                       |         |             |
| 20-29 years                                                | 26 (34.7%)     | 19 (25.3%)   | 0.0194  | 70 (35.0%)          | 18 (36.0%)            | 0.9538  | 133 (33.3%) |
| 30-44 years                                                | 40 (53.3%)     | 33 (44.0%)   |         | 86 (43.0%)          | 22 (44.0%)            |         | 181 (45.3%) |
| 45-60 years                                                | 9 (12.0%)      | 23 (30.7%)   |         | 44 (22.0%)          | 10 (20.0%)            |         | 86 (21.5%)  |
| Valid n                                                    | 75             | 75           |         | 200                 | 50                    |         | 400         |
| <b>Committed relationship</b>                              |                |              |         |                     |                       |         |             |
| Yes                                                        | 66 (88.0%)     | 62 (83.8%)   | 0.4596  | 170 (85.4%)         | 44 (88.0%)            | 0.6398  | 342 (85.9%) |
| No                                                         | 9 (12.0%)      | 12 (16.2%)   |         | 29 (14.6%)          | 6 (12.0%)             |         | 56 (14.1%)  |
| Valid n                                                    | 75             | 74           |         | 199                 | 50                    |         | 398         |
| <b>Marital status</b>                                      |                |              |         |                     |                       |         |             |
| Married                                                    | 32 (42.7%)     | 45 (60.8%)   | 0.0976  | 98 (49.0%)          | 31 (62.0%)            | 0.4302  | 206 (51.6%) |
| Widowed/Divorced                                           | 1 (1.3%)       | 1 (1.4%)     |         | 9 (4.5%)            | 2 (4.0%)              |         | 13 (3.3%)   |
| Separated                                                  | 2 (2.7%)       |              |         | 6 (3.0%)            | 1 (2.0%)              |         | 9 (2.3%)    |
| Never married                                              | 40 (53.3%)     | 28 (37.8%)   |         | 87 (43.5%)          | 16 (32.0%)            |         | 171 (42.9%) |
| Valid n                                                    | 75             | 74           |         | 200                 | 50                    |         | 399         |
| <b>Highest degree</b>                                      |                |              |         |                     |                       |         |             |
| Less than grade 12 including vocational education          | 1 (1.3%)       | 1 (1.3%)     | 0.1752  | 4 (2.0%)            | 3 (6.0%)              | 0.1159  | 9 (2.3%)    |
| High school graduate/GED                                   | 18 (24.0%)     | 11 (14.7%)   |         | 67 (33.8%)          | 21 (42.0%)            |         | 117 (29.4%) |
| Some college/technical school including Associate's degree | 12 (16.0%)     | 6 (8.0%)     |         | 54 (27.3%)          | 7 (14.0%)             |         | 79 (19.8%)  |
| Baccalaureate degree                                       | 40 (53.3%)     | 48 (64.0%)   |         | 68 (34.3%)          | 16 (32.0%)            |         | 172 (43.2%) |
| <b>Ever had Sexual intercourse</b>                         |                |              |         |                     |                       |         |             |
| Yes                                                        | 75 (100.0%)    | 70 (93.3%)   | 0.0229  | 198 (99.0%)         | 46 (92.0%)            | 0.0038  | 389 (97.3%) |
| No                                                         |                | 5 (6.7%)     |         | 2 (1.0%)            | 4 (8.0%)              |         | 11 (2.8%)   |
| Valid n                                                    | 75             | 75           |         | 200                 | 50                    |         | 400         |
| <b>Age at first sexual intercourse</b>                     |                |              |         |                     |                       |         |             |
| Mean                                                       | 20.63          | 21.93        | 0.0470  | 21.92               | 22.84                 | 0.1847  | 21.78       |
| SD                                                         | 3.95           | 3.79         |         | 4.19                | 4.18                  |         | 4.11        |

|                                                         | Men (n=150)    |              | P-value | Women (n=250)       |                       | P-value | Overall      |
|---------------------------------------------------------|----------------|--------------|---------|---------------------|-----------------------|---------|--------------|
|                                                         | With GW (n=75) | No GW (n=75) |         | HPV Disease (n=200) | No HPV Disease (n=50) |         |              |
| Valid n patients                                        | 75             | 68           |         | 196                 | 45                    |         | 384          |
| <b>Number of sex partners in the last 5 years</b>       |                |              |         |                     |                       |         |              |
| No partners                                             |                | 2 (2.9%)     | 0.0014  | 6 (3.0%)            | 2 (4.3%)              | 0.6072  | 10 (2.6%)    |
| 1 partner                                               | 9 (12.0%)      | 30 (42.9%)   |         | 103 (52.3%)         | 30 (65.2%)            |         | 172 (44.3%)  |
| 2-5 partners                                            | 47 (62.7%)     | 25 (35.7%)   |         | 65 (33.0%)          | 13 (28.3%)            |         | 150 (38.7%)  |
| 6-10 partners                                           | 10 (13.3%)     | 9 (12.9%)    |         | 9 (4.6%)            |                       |         | 28 (7.2%)    |
| 11-15 partners                                          | 3 (4.0%)       | 1 (1.4%)     |         | 3 (1.5%)            | 1 (2.2%)              |         | 8 (2.1%)     |
| 16-20 partners                                          | 1 (1.3%)       | 2 (2.9%)     |         | 4 (2.0%)            |                       |         | 7 (1.8%)     |
| 21-25 partners                                          | 3 (4.0%)       |              |         | 2 (1.0%)            |                       |         | 5 (1.3%)     |
| 26-50 partners                                          | 1 (1.3%)       |              |         | 2 (1.0%)            |                       |         | 3 (0.8%)     |
| More than 50 partners                                   | 1 (1.3%)       | 1 (1.4%)     |         | 3 (1.5%)            |                       |         | 5 (1.3%)     |
| Valid n                                                 | 75             | 70           |         | 197                 | 46                    |         | 388          |
| <b>Frequency of condom use</b>                          |                |              |         |                     |                       |         |              |
| Never                                                   | 16 (21.3%)     | 26 (37.7%)   | 0.0614  | 86 (43.7%)          | 24 (52.2%)            | 0.2860  | 152 (39.3%)  |
| Less than half the time                                 | 28 (37.3%)     | 13 (18.8%)   |         | 30 (15.2%)          | 10 (21.7%)            |         | 81 (20.9%)   |
| About half the time                                     | 10 (13.3%)     | 12 (17.4%)   |         | 31 (15.7%)          | 3 (6.5%)              |         | 56 (14.5%)   |
| Not always but more than half the time                  | 16 (21.3%)     | 10 (14.5%)   |         | 26 (13.2%)          | 3 (6.5%)              |         | 55 (14.2%)   |
| Always                                                  | 5 (6.7%)       | 7 (10.1%)    |         | 15 (7.6%)           | 5 (10.9%)             |         | 32 (8.3%)    |
| I have not had sexual intercourse in the last 12 months |                | 1 (1.4%)     |         | 9 (4.6%)            | 1 (2.2%)              |         | 11 (2.8%)    |
| Valid n                                                 | 75             | 69           |         | 197                 | 46                    |         | 387          |
| <b>Sexual partners in lifetime</b>                      |                |              |         |                     |                       |         |              |
| Heterosexual partners                                   | 74 (100.0%)    | 70 (100.0%)  |         | 198 (100.0%)        | 46 (100.0%)           |         | 388 (100.0%) |
| Valid n                                                 | 74             | 70           |         | 198                 | 46                    |         | 388          |
| <b>Sexual partners in the last 12 months</b>            |                |              |         |                     |                       |         |              |
| Heterosexual partners                                   | 74 (100.0%)    | 69 (100.0%)  |         | 194 (100.0%)        | 46 (100.0%)           |         | 383 (100.0%) |
| Mean                                                    | 2.57           | 1.80         | 0.0829  | 2.06                | 1.20                  | 0.2046  | 2.01         |
| SD                                                      | 2.81           | 2.49         |         | 4.50                | 0.63                  |         | 3.62         |
| Valid n                                                 | 74             | 69           |         | 194                 | 46                    |         | 383          |

218

219



220 GW=genital warts; HPV=human papillomavirus; SD=standard deviation; GED=general educational development

221 The sexual activity of surveyed patients according to gender and GW or selected HPV-  
222 related disease is shown in Table 1. Male GW patients reported a younger age at first intercourse  
223 compared to female patients (20.6 [4.0] vs. 21.9 [4.2]), and had a greater number of sexual partners  
224 (p=0.0014) than those without GW. A higher percentage of female patients with HPV-related  
225 diseases reported having had sexual intercourse compared to those without HPV-related diseases  
226 (99.0% vs. 92.0%, p=0.0038). No statistically significant differences were observed for any of the  
227 remaining sexual activity questions, as reported in Table 1.

228

229

231 *Psychosocial Impact*

232 HIP scores for male and female patients are summarized in Table 2. Significantly higher  
 233 HIP scores were observed among men with GW compared to those without GW for all domains  
 234 of the score except for ‘control-life impact’. Eighty-five percent of men with GW and 32.0% of  
 235 men without GW reported a moderate psychological impact ( $p < 0.0001$ ).

236 **Table 2. HIP Questionnaire Scores of Participating Patients by GW and HPV-related**  
 237 **Diagnosis in South Korea**

|                             | Men (n=150)    |              | ES   | P-value | Women (n=250)*      |                       | ES   | P-value |
|-----------------------------|----------------|--------------|------|---------|---------------------|-----------------------|------|---------|
|                             | With GW (n=75) | No GW (n=75) |      |         | HPV Disease (n=200) | No HPV Disease (n=50) |      |         |
| <b>HIP total score</b>      |                |              |      |         |                     |                       |      |         |
| Mean                        | 50.90          | 36.13        | 1.69 | <0.0001 | 53.37               | 44.98                 | 0.68 | <0.0001 |
| 95% CI                      | (48.8; 53.0)   | (34.3; 38.0) |      |         | (51.8; 55.0)        | (41.4; 48.6)          |      |         |
| Valid n                     | 75             | 75           |      |         | 199                 | 50                    |      |         |
| <b>Worries and concerns</b> |                |              |      |         |                     |                       |      |         |
| Mean                        | 49.65          | 24.25        | 1.51 | <0.0001 | 57.19               | 41.94                 | 0.63 | <0.0001 |
| 95% CI                      | (45.5; 53.8)   | (20.8; 27.7) |      |         | (54.2; 60.2)        | (35.5; 48.4)          |      |         |
| Valid n                     | 75             | 75           |      |         | 199                 | 49                    |      |         |
| <b>Emotional impact</b>     |                |              |      |         |                     |                       |      |         |
| Mean                        | 49.10          | 33.98        | 1.19 | <0.0001 | 56.08               | 42.32                 | 0.84 | <0.0001 |
| 95% CI                      | (46.0; 52.2)   | (31.3; 36.6) |      |         | (53.8; 58.4)        | (37.8; 46.8)          |      |         |
| Valid n                     | 75             | 75           |      |         | 199                 | 50                    |      |         |
| <b>Sexual impact</b>        |                |              |      |         |                     |                       |      |         |
| Mean                        | 47.53          | 41.20        | 0.51 | 0.0019  | 50.81               | 49.80                 | 0.07 | 0.6550  |
| 95% CI                      | (45.1; 50.0)   | (38.1; 44.3) |      |         | (48.9; 52.8)        | (45.3; 54.3)          |      |         |
| Valid n                     | 75             | 75           |      |         | 197                 | 49                    |      |         |
| <b>Self-Image</b>           |                |              |      |         |                     |                       |      |         |
| Mean                        | 49.00          | 41.63        | 0.76 | <0.0001 | 47.66               | 45.17                 | 0.19 | 0.2226  |
| 95% CI                      | (46.5; 51.5)   | (39.8; 43.5) |      |         | (45.9; 49.5)        | (41.4; 48.9)          |      |         |

|                                        | Men (n=150)    |              | ES   | P-value | Women (n=250)*      |                       | ES   | P-value |
|----------------------------------------|----------------|--------------|------|---------|---------------------|-----------------------|------|---------|
|                                        | With GW (n=75) | No GW (n=75) |      |         | HPV Disease (n=200) | No HPV Disease (n=50) |      |         |
| Valid n                                | 75             | 75           |      |         | 199                 | 50                    |      |         |
| <b>Partner issues and transmission</b> |                |              |      |         |                     |                       |      |         |
| Mean                                   | 62.16          | 42.12        | 1.40 | <0.0001 | 58.86               | 47.23                 | 0.62 | 0.0001  |
| 95% CI                                 | (59.1; 65.2)   | (38.5; 45.8) |      |         | (56.2; 61.5)        | (41.8; 52.6)          |      |         |
| Valid n                                | 74             | 66           |      |         | 185                 | 47                    |      |         |
| <b>Interactions with doctors</b>       |                |              |      |         |                     |                       |      |         |
| Mean                                   | 51.31          | 33.28        | 0.90 | <0.0001 | 46.75               | 45.73                 | 0.20 | 0.6611  |
| 95% CI                                 | (47.4; 55.3)   | (25.2; 41.4) |      |         | (44.8; 48.7)        | (40.8; 50.6)          |      |         |
| Valid n                                | 71             | 30           |      |         | 199                 | 50                    |      |         |
| <b>Control - life impact</b>           |                |              |      |         |                     |                       |      |         |
| Mean                                   | 49.69          | 52.13        | 0.23 | 0.1643  | 48.48               | 52.37                 | 0.31 | 0.0641  |
| 95% CI                                 | (47.3; 52.0)   | (49.6; 54.7) |      |         | (46.6; 50.4)        | (49.2; 55.5)          |      |         |
| Valid n                                | 75             | 75           |      |         | 199                 | 50                    |      |         |
| <b>HIP total score categorized</b>     |                |              |      |         |                     |                       |      |         |
| No or little impact                    | 11 (14.7%)     | 51 (68.0%)   |      | <0.0001 | 23 (11.5%)          | 17 (34.0%)            |      | 0.0004  |
| Moderate impact                        | 64 (85.3%)     | 24 (32.0%)   |      |         | 168 (84.0%)         | 30 (60.0%)            |      |         |
| Heavy psychological impact             |                |              |      |         | 9 (4.5%)            | 3 (6.0%)              |      |         |
| Valid n                                | 75             | 75           |      |         | 200                 | 50                    |      |         |

\* HPV=human papillomavirus is included in this table. GW=genital warts; CI=confidence interval; HIP=human papillomavirus impact profile; ES=Effect size. Effect size (ES) >0.01 is considered significant. HIP items range from 0 (lowest impact) to 10 point (highest impact). CECA scores range from 0 (worst HRQL) to 100 (the best HRQL) EQ-5D range from 0 (worst imaginable health state) to 100 (best imaginable health state)

When comparing women diagnosed with HPV-related disease to those without disease, significant differences were observed for the ‘worries and concerns’, ‘emotional impact’, and ‘partner’s issues and transmission’ domains. In all domains, female patients with HPV-related

1  
2  
3  
4 248 disease had higher scores, reflecting a higher psychological impact (88.5% of female patients with  
5  
6 249 selected HPV-related diseases vs. 66.0% without reported a moderate or heavy psychological  
7  
8  
9 250 impact [ $p=0.0004$ ]).

10  
11 251 HIP scores by specific HPV-related disease were also conducted. In all domains except for  
12  
13 252 ‘control-life impact’ and ‘emotional impact’, significant differences were identified. Higher scores,  
14  
15 253 and thereby higher psychological impact, were reported by patients with external GW. All GW  
16  
17 254 patients had either moderate or heavy psychological impact (90.0% and 10.0%, respectively). In  
18  
19 255 all domains, female patients with selected HPV-related diseases had higher scores, reflecting a  
20  
21 256 higher psychological impact (Appendix Table A-3).

22  
23  
24  
25 257 CECA scores stratified by gender are shown in Figure 1. Women with GW reported  
26  
27 258 significantly lower scores on the ‘emotional health’ (mean [SD], 7.2 [4.2]), and ‘sexual activity’  
28  
29 259 dimensions (11.0 [5.8]) compared to men with GW – ‘emotional health’ dimension (10.5 [3.8])  
30  
31 260 and ‘sexual activity’ dimension (15.9 [6.1]) – indicating worse HRQoL among women.

32  
33  
34 261 No significant differences were observed for problems reported by male patients in the EQ-  
35  
36 262 5D descriptive system by GW diagnosis, as most male patients reported no problems. Among  
37  
38 263 those who reported problems, the most frequent were ‘pain-discomfort’ (10.7%) and ‘anxiety-  
39  
40 264 depression’ (12.7%, Table 3). Female patients with selected HPV-related diseases reported more  
41  
42 265 problems related to the EQ-5D ‘anxiety-depression’ dimension than those without. Thirty-one  
43  
44 266 percent of those with selected HPV-related diseases reported feeling moderately or extremely  
45  
46 267 anxious or depressed, compared to 10.0% of female patients without HPV-related diseases. There  
47  
48 268 were no statistically significant differences in the remaining EQ-5D items between female patients  
49  
50 269 with and without HPV-related diseases (Table 3).

270 **Table 3. EQ-5D Descriptive System Results by Male and Female patients with and without**  
 271 **GW and Selected HPV-related Diseases in South Korea**

|                                                          | Men (n=150)    |              | P-value | Women (n=250)       |                       | P-value |
|----------------------------------------------------------|----------------|--------------|---------|---------------------|-----------------------|---------|
|                                                          | With GW (n=75) | No GW (n=75) |         | HPV Disease (n=200) | No HPV Disease (n=50) |         |
| <b>Mobility</b>                                          |                |              |         |                     |                       |         |
| I have no problems walking about                         | 73 (97.3%)     | 75 (100.0%)  | 0.1545  | 193 (97.0%)         | 49 (98.0%)            | 0.6979  |
| I have some problems walking about                       | 2 (2.7%)       |              |         | 6 (3.0%)            | 1 (2.0%)              |         |
| Valid n                                                  | 75             | 75           |         | 199                 | 50                    |         |
| <b>Self-Care</b>                                         |                |              |         |                     |                       |         |
| I have no problems with self-care                        | 75 (100.0%)    | 75 (100.0%)  | --      | 197 (99.0%)         | 50 (100.0%)           | 0.7762  |
| I have some problems washing or dressing myself          |                |              |         | 1 (0.5%)            |                       |         |
| I am unable to wash or dress myself                      |                |              |         | 1 (0.5%)            |                       |         |
| Valid n                                                  | 75             | 75           |         | 199                 | 50                    |         |
| <b>Usual Activities</b>                                  |                |              |         |                     |                       |         |
| I have no problems with performing my usual activities   | 72 (96.0%)     | 75 (100.0%)  | 0.0802  | 196 (98.5%)         | 49 (98.0%)            | 0.8044  |
| I have some problems with performing my usual activities | 3 (4.0%)       |              |         | 3 (1.5%)            | 1 (2.0%)              |         |
| Valid n                                                  | 75             | 75           |         | 199                 | 50                    |         |
| <b>Pain - Discomfort</b>                                 |                |              |         |                     |                       |         |
| I have no pain or discomfort                             | 65 (86.7%)     | 69 (92.0%)   | 0.2900  | 165 (82.9%)         | 40 (80.0%)            | 0.6291  |
| I have moderate pain or discomfort                       | 10 (13.3%)     | 6 (8.0%)     |         | 34 (17.1%)          | 10 (20.0%)            |         |
| Valid n                                                  | 75             | 75           |         | 199                 | 50                    |         |
| <b>Anxiety - Depression</b>                              |                |              |         |                     |                       |         |
| I am not anxious or depressed                            | 66 (88.0%)     | 65 (86.7%)   | 0.8061  | 136 (68.3%)         | 45 (90.0%)            | 0.0078  |
| I am moderately anxious or depressed                     | 9 (12.0%)      | 10 (13.3%)   |         | 56 (28.1%)          | 5 (10.0%)             |         |
| I am extremely anxious or depressed                      |                |              |         | 7 (3.5%)            |                       |         |
| Valid n                                                  | 75             | 75           |         | 199                 | 50                    |         |

272 EQ-5D=EuroQol-5 Dimension; GW=genital warts; HPV=human papillomavirus; SD=standard deviation

273 'HIP items range from 0 (lowest impact) to 10 point (highest impact).

274 CECA scores range from 0 (worst HRQL) to 100 (the best HRQL)

275 EQ-5D range from 0 (worst imaginable health state) to 100 (best imaginable health state)

276

277

EQ-5D descriptive system responses were also compared among female patients by HPV-related disease (Appendix Table A-4). The only two dimensions with significant differences were 'pain/discomfort' ( $p=0.0146$ ) and 'anxiety/depression' ( $p=0.0387$ ). A higher percentage of female GW patients reported being 'moderately anxious or depressed' and 'extremely anxious or depressed' (48.0%), followed by those with precancerous lesions (34.7%) and those presenting abnormal Pap test and HPV positive results (24.0%) (Appendix Table A-4).

Table 4 shows VAS scores and utility values obtained from male participants according to GW diagnosis. Those patients with GW reported significantly lower mean VAS scores (75.3) than those without (81.1,  $p=0.0135$ ). No significant differences in utility values according to GW diagnosis were identified.

**Table 4 EQ-5D VAS Scores and Utility Values by Male Patients with and without GW and Female Patients with and without Selected HPV-related Disease in South Korea**

|                       | Men (n=150)    |              | ES    | P-value | Overall      | Women (n=250)       |                       | ES   | P-value | Overall      |
|-----------------------|----------------|--------------|-------|---------|--------------|---------------------|-----------------------|------|---------|--------------|
|                       | With GW (n=75) | No GW (n=75) |       |         |              | HPV disease (n=200) | No HPV disease (n=50) |      |         |              |
| <b>VAS (EQ-5D)</b>    |                |              |       |         |              |                     |                       |      |         |              |
| Mean                  | 75.31          | 81.13        | 0.41  | 0.0135  | 78.16        | 72.18               | 76.86                 | 0.30 | 0.0606  | 73.14        |
| 95% CI                | (71.6; 79.0)   | (78.4; 83.9) |       |         | (75.8; 80.5) | (69.9; 74.4)        | (72.6; 81.1)          |      |         | (71.2; 75.1) |
| Valid n               | 74             | 71           |       |         | 145          | 190                 | 49                    |      |         | 239          |
| <b>Utility values</b> |                |              |       |         |              |                     |                       |      |         |              |
| Mean                  | 0.95           | 0.95         | <0.01 | 0.7527  | 0.95         | 0.90                | 0.94                  | 0.27 | 0.0773  | 0.91         |
| 95% CI                | (0.9; 1.0)     | (0.9; 1.0)   |       |         | (0.9; 1.0)   | (0.9; 0.9)          | (0.9; 1.0)            |      |         | (0.9; 0.9)   |
| Valid n               | 75             | 75           |       |         | 150          | 199                 | 50                    |      |         | 249          |

291

292 HPV = human papillomavirus; GW = genital warts; CI = confidence interval; EQ-5D = EuroQol-5 Dimension; ES =  
293 Effect size. Effect size (ES) >0.01 is considered significant.

294

295 ‘HIP items range from 0 (lowest impact) to 10 point (highest impact).

296 CECA scores range from 0 (worst HRQL) to 100 (the best HRQL)

297 EQ-5D range from 0 (worst imaginable health state) to 100 (best imaginable health state)

298

299

300 Female patients with selected HPV-related diseases showed numerically lower mean VAS  
301 scores (72.2) and utility values (0.90) than those without selected HPV-related diseases (76.86 and  
302 0.94, respectively), but the differences were not significant. When comparing selected HPV-  
303 related diseases, the lowest VAS and utility scores (worst HRQoL) were observed in GW patients  
304 ( $p < 0.0001$ , Appendix Table A-5).

## 305 Discussion

306 This cross-sectional study estimated the psychosocial burden of GW and HPV related  
307 diseases in South Korea by obtaining self-reported HPV disease-related information among male  
308 and female patients age 20-60 years presenting to clinics where cervical cytology screenings,  
309 including GW screenings, were performed, and where men and women were seen for HPV-related  
310 diseases. To our knowledge, this is the first study that has looked at the psychosocial burden of  
311 GW and HPV-related disease on patients' quality of life in South Korea. Higher HIP score values,  
312 reflecting a greater psychosocial impact of the disease, were recorded for men with GW than for  
313 those without GW (50.90 vs. 36.13) and in women diagnosed with HPV-related diseases than for  
314 those without (53.37 vs. 44.98).

315 Overall, female patients had a greater psychosocial impact compared to male patients (HIP  
316 scores: 51.69 vs. 43.51). Similarly, male patients had better HRQoL indicating lower psychosocial  
317 impact compared to female patients, as assessed by CECA scores (6.33 vs. 4.34). VAS scores

1  
2  
3  
4 318 ranged from 0 (worst imaginable health status) to 100 (best imaginable health status), and female  
5  
6  
7 319 patients reported worse health status (73.14) compared to male patients (78.16), particularly female  
8  
9 320 patients with HPV-related diseases (72.18). In addition, GW patients reported worse HRQoL  
10  
11 321 scores compared to those without GW in the disease-specific HIP questionnaire. Furthermore,  
12  
13 322 women reported poorer health status following a GW diagnosis than a CIN diagnosis. These results  
14  
15  
16 323 are consistent with a Chinese study by Wang *et al* [29] which reported that female GW patients  
17  
18 324 had the highest mean HIP scores (52.2), showing a significant psychological impact, followed by  
19  
20  
21 325 patients with precancerous cervical lesions (48.6), HPV after abnormal Pap test results (45.8),  
22  
23 326 abnormal Pap test results without HPV test (44.1), and HPV after abnormal Pap test results (43.1).

24  
25 327 In the current study, HRQoL results suggest that GW in males and HPV-related disease  
26  
27 328 (high-grade dysplasia requiring ablation treatment) in female patients had a negative impact on  
28  
29  
30 329 patient well-being and HRQoL scores. This study also observed that female GW patients suffered  
31  
32 330 a major impact compared to those with other selected HPV-related diseases. Previous studies have  
33  
34 331 shown that patients with GW had significantly lower quality of life, and substantial psychosocial  
35  
36  
37 332 burden with higher social stigma – especially when GW infection is symptomatic, visible to the  
38  
39 333 naked eye, and found in the genital region [30,31,32]. In addition, a study that compared GW  
40  
41 334 patients with asymptomatic genitourinary internal medicine patients observed that patients with  
42  
43  
44 335 GW had a significantly higher psychological burden because of the GW infection compared to the  
45  
46 336 other patients. The study also observed that infection with GW not only influences the patient's  
47  
48 337 physical wellbeing but also has a potentially detrimental effect on the patient's emotions [33].  
49  
50 338 This could explain the observed poorer health status in GW patients evaluated in this study.  
51  
52  
53 339 Furthermore, the highest score was in the 'partner issue and transmission' category, followed by  
54  
55 340 'worries and concerns' and 'emotional impact', with a HIP mean score >60. The lowest scores



1  
2  
3  
4 341 were in the ‘control-life impact’ category (mean HIP score 45.20). A similar study using the HIP  
5  
6 342 survey instrument in Australia found that the largest impact of GW on quality of life was in the  
7  
8  
9 343 domains of ‘sexual impact’, ‘self-image,’ and ‘partner and transmission’ [24].  
10

11 344 Based on EQ-5D survey results, GW and selected HPV-related disease patients reported  
12  
13 345 more problems related to ‘anxiety-depression’ than those without these conditions. The current  
14  
15  
16 346 study detected a lower impact of GW as assessed by EQ-5D than in the previous Canadian study  
17  
18 347 [34]. HRQoL scores in each of the questionnaires reported by female study patients were  
19  
20 348 descriptively compared among the study subgroups (abnormal Pap result, abnormal Pap and HPV  
21  
22 349 positive results, precancerous lesions, and external GW). While GW has an impact on HRQoL in  
23  
24  
25 350 the current study, the precise impact is difficult to assess due to scarcity of data and the  
26  
27 351 heterogeneity of the instruments used to compare scores of GW patients with those of the general  
28  
29  
30 352 population [35].  
31

32 353 Shin *et al.* conducted a similar study in mainland China in 2012 and found that 56.4% of  
33  
34 354 patients reported some problems in the ‘anxiety and depression’ dimension (highest), followed by  
35  
36 355 ‘pain and discomfort’ (24.7%) and ‘mobility’ (3.5%) [16]. In a study from the United Kingdom in  
37  
38  
39 356 2008, Woodhall *et al.* found that female GW patients had lower VAS and EQ-5D index scores  
40  
41 357 than control patients, even after adjusting for age and gender. The difference was particularly  
42  
43 358 notable in young women [36]. Consistent with the current study results, Woodhall *et al.* also  
44  
45  
46 359 reported that the ‘pain and discomfort’ and ‘depression and anxiety’ dimensions were the two most  
47  
48 360 affected domains.  
49

50 361 This study also observed that 60% of women with no GW reported a moderate impact in  
51  
52  
53 362 the HIP scoring. Reasons for this impact level among these patients were not evaluated. However,  
54  
55  
56  
57  
58  
59  
60

1  
2  
3  
4 363 there is the possibility that these patients may have had other conditions during presentation at the  
5  
6  
7 364 clinic that may have impacted their HIP score.

8  
9 365 Overall, the results of the current study suggest that a GW diagnosis has a great  
10  
11 366 psychosocial impact on female patients. Other studies have provided evidence that the  
12  
13 367 psychosocial impact of sexually transmitted disease diagnoses may be greater for women than for  
14  
15 368 men. The origin of these differences is not clear, but they may be due to sexual infectivity and  
16  
17 369 reproductive health [36]. Furthermore, research among women who received abnormal cervical  
18  
19 370 smear test results have indicated that they often experienced psychosocial consequences including  
20  
21 371 anxiety, fears about cancer, sexual difficulties, changes in body image and concerns regarding loss  
22  
23 372 of reproductive function [13,37]. Shi *et al.* also indicated in their study that culture plays an  
24  
25 373 important role, as conservative cultures (such as South Korea) view a diagnosis of a sexually  
26  
27 374 transmitted disease such as GW as disgraceful. Consequently, patients would not seek support,  
28  
29 375 even from their own families [16]. Additionally, continued study of HPV natural history among  
30  
31 376 men from different geographic regions is necessary to elucidate the underlying HPV-related  
32  
33 377 diseases occurring in these populations.

## 38 **Limitations**

39  
40  
41  
42  
43 379 The current study is limited, as selection bias may have occurred due to the convenience  
44  
45 380 sample approach used. The data were collected in participating physician offices and clinics  
46  
47 381 through questionnaires and interview-based surveys. Patients may have given expected rather than  
48  
49 382 truthful answers, which may not give the true psychosocial impact. Moreover, only patients who  
50  
51 383 sought professional GW treatment were included in the study, which may not be generalizable to  
52  
53 384 the entire South Korean GW population. As the study was cross-sectional in design, it can only  
54  
55  
56  
57  
58  
59

1  
2  
3  
4 385 report the impact of GW on the patients at the time the survey was taken, rather than longer-term  
5  
6 386 impact. However, in a longitudinal study conducted to determine the impact of HPV status on  
7  
8 387 quality of life (QoL) in oral cavity and oropharyngeal squamous cell carcinoma, results showed  
9  
10 388 that QoL scores were lower in HPV positive patients. [38] The study design is a simple descriptive  
11  
12 389 comparison of outcomes, so potential factors that might mediate or moderate the psychosocial  
13  
14 390 effects of GW were not evaluated. We recommend that for future studies on GW in South Korea,  
15  
16 391 multivariate analysis be carried out to address these factors.  
17  
18  
19  
20

## 21 392 **Conclusion**

22 393  
23 394 The diagnosis of GW, a common sexually transmitted disease, has significant associated  
24  
25 395 morbidity – largely due to the psychosocial impact GW have on patients. Prevention of all HPV-  
26  
27 396 related diseases, cancers, and non-cancerous lesions is important. Vaccines that have broad  
28  
29 397 protection against multiple HPV types should be considered. In addition, the results of this study  
30  
31 398 can help direct guidelines for patient counseling and health education and emphasize the need to  
32  
33 399 include HPV vaccine programs as a part of national vaccine programs. The purpose of this study  
34  
35 400 was to determine the psychosocial impact of GW among male and female patients in South Korea  
36  
37 401 utilizing various validated tools, given that literature related to the psychosocial impact of GW is  
38  
39 402 scarce in this country. The current study results, utilizing HRQoL, suggest that GW in males and  
40  
41 403 high-grade dysplasia requiring ablation treatment in female patients have a negative impact on  
42  
43 404 patient well-being and HRQoL. The psychosocial burden was particularly greater among female  
44  
45 405 GW patients compared to those with other selected HPV-related disease.  
46  
47  
48  
49  
50

51 406 Although recent studies have looked at the psychosocial impact of GW on HRQoL in other  
52  
53 407 places like China, [11] Singapore, [12] and the UK, [13] this study highlights the psychosocial  
54  
55 408 impact of GW on HRQoL for infected patients in South Korea. Previously published studies used  
56  
57  
58  
59  
60

1  
2  
3  
4 409 for comparison to the results of this study vary substantially in methodology and are different in  
5  
6  
7 410 nature due to the dissimilarities of GW across regions and cultures. However, the current study  
8  
9 411 offers baseline data, and further research is encouraged to measure the psychosocial burden of GW  
10  
11 412 in South Korea. Despite its limitations, the current study offers groundwork for measurement of  
12  
13 413 the psychosocial impact of GW in South Korea that was previously unavailable.  
14  
15

## 16 414 **Contributorship Statement**

17  
18  
19  
20 415 TSL, SKT, PKS, KY, AK, ARG, SMG, WJ, NL, and MR conceived and designed the experiments for  
21  
22 416 this manuscript.

23  
24 417 NL, MR, SKT, PKS, AK performed the experiments for this manuscript.

25  
26  
27 418 NL, MR analyzed the data for this manuscript.

28  
29  
30 419 NL, MR contributed reagents/materials/analysis tools for this manuscript.

31  
32 420 All authors contributed to the writing of this manuscript.  
33  
34  
35  
36 421  
37  
38  
39  
40  
41  
42  
43  
44  
45  
46  
47  
48  
49  
50  
51  
52  
53  
54  
55  
56  
57  
58  
59  
60

## 422 Funding

423 This study was funded by Merck and Co.

## 424 Competing Interests

- 425     ▪ T.S. Lee has no conflicts to declare.
- 426     ▪ K. Yee was a paid contractor for Merck and Co. at the time of the study and was an  
427       employee of Cubist Pharmaceuticals December 2014 – July 2015, which was acquired by  
428       Merck and Co. in January 2015.
- 429     ▪ A. Kulkarni, S. Kothari-Talwar, and P.K. Singhal are employees of Merck and Co.
- 430     ▪ S.M. Garland received Grants to her institution from the Commonwealth Department of  
431       Health for HPV genoprevalance surveillance post vaccination, Merck and Co., and Glaxo  
432       Smith Kline to perform phase 3 clinical vaccine trials: Merck to evaluate HPV in RRP  
433       post vaccination programme; CSL for HPV in cervical cancer study, and VCA for a study  
434       on the effectiveness of a public health HPV vaccine study, and a study on the associations  
435       of early onset cancers. Received speaking fees from MSD and SPMSD for work  
436       performed in her personal time. Merck and Co. paid for travel & accommodation to  
437       present at HPV Advisory board meetings.
- 438     ▪ A.R. Giuliano is a member of Merck & CO, Inc. advisory boards. Her institution has  
439       received grants and contracts to support HPV-related research.
- 440     ▪ N. Lara and M. Roset are employees of IMS Health, Barcelona, Spain, which is a paid  
441       consultant to Merck and Co.
- 442     ▪ W. Ju has no conflicts to declare.

## 443 **Data Sharing Agreement**

444 The data collected is the property of Merck & Co. Inc., and can be accessed with permission  
445 from Merck & Co. Inc

## 446 **Supporting Information**

### 447 **Figure Legends**

#### 448 **Figure 1. CECA Questionnaire Scores by Male and Female Patients with GW in South** 449 **Korea**

450 CECA=*Cuestionario Especifico para Condiloma Acuminado* (in Spanish) – ‘Specific questionnaire for  
451 Condylomata Acuminata’; GW=genital warts

#### 452 **Participating Physicians by Region in South Korea**

453 DERM=dermatologist; OBGYN=obstetrician/gynecologist; PCP=primary care physician; URO=urologist

#### 454 **Table A-1. Target Number Of Clinics Within A Specialty Per City in South Korea**

#### 455 **Table A-2. Participating Physicians by Region in South Korea**

#### 456 **Table A-3. HIP Questionnaire Scores by Female Patients and selected HPV-related**

#### 457 **diseases in South Korea**

458 HPV=human papillomavirus; HIP=HPV impact profile; Pap=Papanicolaou test; GW=genital warts; CI=confidence  
459 interval

#### 460 **Table A-4. EQ-5D Descriptive System Results by Female Patients and selected HPV-** 461 **related Diseases in South Korea (excluding control group)**

462 EQ-5D=EuroQol-5 Dimension; HPV=human papillomavirus; Pap=Papanicolaou test; GW=genital warts

#### 463 **Table A-5. EQ-5D VAS and Utility Scores for Female Patients by selected HPV-related** 464 **Diseases in South Korea (excluding control group)**

465 EQ-5D=EuroQol-5 Dimension; VAS=visual analog scores; HPV=human papillomavirus;  
466 Pap=Papanicolaou test; GW=genital warts; CI=confidence interval

467 **References**

1. Arima Y, Winer RL, Feng Q, et al. Development of genital warts after incident detection of human papillomavirus infection in young men. *J Infect Dis.* 2010;202(8):1181-4.
2. Patel H, Wagner M, Singhal P, Kothari S. Systematic review of the incidence and prevalence of genital warts. *BMC Infect Dis.* 2013;13(1):39.
3. Pirotta MV, Stein AN, Fairley CK, et al. Patterns of treatment of external genital warts in Australian sexual health clinics. *Sex Transm Dis.* 2009;36(6):375-9.
4. Winer RL, Lee SK, Hughes JP, et al. Genital human papillomavirus infection: incidence and risk factors in a cohort of female university students. *Am J Epidemiol.* 2003;157(3):218-26.
5. Flores-Díaz E, Sereday KA, Ferreira S, et al. HPV-6 molecular variants association with the development of genital warts in men: The HIM Study. *J Infect Dis.* 2016;215(4):559-56.
6. Gall SA. Female genital warts: global trends and treatments. *Infect Dis Obstet Gynecol.* 2001;9(3):149-54.
7. Garland SM, Steben M, Sings HL, et al. Natural history of genital warts: Analysis of the placebo arm of 2 randomized phase III trials of a quadrivalent human papillomavirus (types 6, 11, 16, and 18) vaccine. *J Infect Dis.* 2009;199(6):805-14.
8. Stamm AW, Kobashi KC, Stefanovic KB. Urologic Dermatology: a Review. *Curr Urol Rep.* 2017;18(8):6.
9. Kim MA, Oh JK, Kim BW, et al. Prevalence and seroprevalence of low-risk human papillomavirus in Korean women. *J Korean Med Sci.* 2012;27(8):922-8.

- 10 Lee TS, Kothari-Talwar S, Singhal PK, et al. A cross-sectional study estimating the burden of illness related to genital warts in South Korea. *BMJ Open*. 2017;7(6):e01421.
- 11 Tan LS, Chio MT, Sen P, et al. Assessment of psychosocial impact of genital warts among patients in Singapore. *Sex Health*. 2014;11(4):313-318.
- 12 Qi SZ, Wang SM, Shi JF, et al. Human papillomavirus-related psychosocial impact of patients with genital warts in China: a hospital-based cross-sectional study. *BMC Public Health*. 2014;14(1):739.
- 13 Dominiak-Felden G, Cohet C, Atrux-Tallau S, et al. Impact of human papillomavirus-related genital diseases on quality of life and psychosocial wellbeing: results of an observational, health-related quality of life study in the UK. *BMC Public Health*. 2013;13(1):1065.
- 14 Jeynes C, Chung M, Challenor R. 'Shame on you'—the psychosocial impact of genital warts. *Int J STD AIDS*. 2009;20(8):557-60.
- 15 Maw R, Reitano M, Roy M. An international survey of patients with genital warts: perceptions regarding treatment and impact on lifestyle. *Int J STD AIDS*. 1998;9(10):571-8.
- 16 Mast TC, Zhu X, Demuro-Mercon C, et al. Development and psychometric properties of the HPV Impact Profile (HIP) to assess the psychosocial burden of HPV. *Curr Med Res Opin*. 2009;25(11):2609-19.
- 17 Shi JF, Kang DJ, Qi SZ, et al. Impact of genital warts on health related quality of life in men and women in mainland China: a multicenter hospital-based cross-sectional study. *BMC Public Health*. 2012;12(1):153.



- 
- 1  
2  
3  
4  
5  
6 18 Vilata JJ, Varela JA, Olmos L, *et al.* Validation and clinical use of the CECA, a disease-specific  
7 quality of life questionnaire for patients with anogenital condylomata acuminata. *Acta*  
8 *dermato-venereologica*. 2008;88(3):257-62.  
9  
10  
11  
12  
13 19 Wang KL, Jeng CJ, Yang YC, *et al.* The psychological impact of illness among women  
14 experiencing human papillomavirus-related illness or screening interventions. *J*  
15 *Psychosomatic Obstet Gynecol*. 2010;31(1):16-23.  
16  
17  
18  
19  
20 20 Pirotta M, Stein AN, Conway EL, *et al.* Genital warts incidence and healthcare resource  
21 utilisation in Australia. *Sex Transm Infect*. 2010;86:181-6.  
22  
23  
24  
25 21 Kang HS, Moneyham L. Attitudes toward and intention to receive the human papilloma virus  
26 (HPV) vaccination and intention to use condoms among female Korean college students.  
27 *Vaccine*. 2010;28(3):811-16.  
28  
29  
30  
31  
32 22 Kim YT. Current status of cervical cancer and HPV infection in Korea. *J Gynecol Oncol*.  
33 2009;20(1):1-7.  
34  
35  
36  
37  
38 23 Kim HW. Knowledge about human papillomavirus (HPV), and health beliefs and intention to  
39 recommend HPV vaccination for girls and boys among Korean health teachers. *Vaccine*.  
40 2012;30(36):5327-34.  
41  
42  
43  
44  
45 24 Pirotta M, Ung L, Stein A, *et al.* The psychosocial burden of human papillomavirus related  
46 disease and screening interventions. *Sex Transm Infect*. 2009;85(7):508-13.  
47  
48  
49  
50 25 Badia X, Colombo JA, Lara N, *et al.* Combination of qualitative and quantitative methods for  
51 developing a new health related quality of life measure for patients with anogenital warts.  
52 *Health Qual Life Outcomes*. 2005;3:24.  
53  
54  
55  
56  
57  
58  
59  
60

- 1  
2  
3  
4  
5  
6 26 EuroQol Group. EuroQol--a new facility for the measurement of health-related quality of life.  
7  
8 Health Policy. 1990;16:199-208.  
9  
10  
11 27 Tsuchiya A, Ikeda S, Ikegami N, et al. Estimating an EQ-5D population value set: the case of  
12  
13 Japan. Health Econ. 2002;11(4):341-53.  
14  
15  
16 28 Sakthong P, Charoenvisuthiwongs R, Shabunthom R. A comparison of EQ-5D index scores  
17  
18 using the UK, US, and Japan preference weights in a Thai sample with type 2 diabetes. Health  
19  
20 Qual Life Outcomes. 2008;6:71.  
21  
22  
23 29 Wang KL, Shi JF, Kang DJ, et al. Chinese HPV study group. Impact of human papillomavirus-  
24  
25 related lesions on quality of life: a multicenter hospital-based study of women in Mainland  
26  
27 China. Int J Gynecol Cancer. 2011;21:182-8.  
28  
29  
30 30 McCaffery K, Forrest S, Waller J, Desai M, Szarewski A, Wardle J. Attitudes towards HPV  
31  
32 testing: a qualitative study of beliefs among Indian, Pakistani, African-Caribbean and white  
33  
34 British women in the UK. Br J Cancer. 2003;88(1):2003:42.  
35  
36  
37 31 Mortensen GL, Larsen HK. The quality of life of patients with genital warts: a qualitative  
38  
39 study. BMC Public Health. 2010;10:113.  
40  
41  
42 32 Qi SZ, Wang SM, Shi JF, et al. Human papillomavirus-related psychosocial impact of patients  
43  
44 with genital warts in China: a hospital-based cross-sectional study. BMC Public Health.  
45  
46 2014;14(1):739.  
47  
48  
49 33 Jeynes C, Chung MC, Challenor R. 'Shame on you'--the psychosocial impact of genital  
50  
51 warts. Int J STD AIDS. 2009;20(8):557-560.  
52  
53  
54  
55  
56  
57  
58  
59  
60

- 
- 1  
2  
3  
4  
5  
6 34 Senecal M, Brisson M, Maunsell E, et al. Loss of quality of life associated with genital warts:  
7  
8 baseline analyses from a prospective study. *Sex Transm Infect.* 2011;87(3):209-15.  
9  
10  
11 35 Scarbrough Lefebvre C, Van Krieking G, Goncalves M, de Sanjose S. Appraisal of the burden  
12  
13 of genital warts from a healthcare and individual patient perspective. *Pub Health.*  
14  
15 2011;125(7):464-75.  
16  
17  
18 36 Woodhall S, Ramsey T, Cai C, et al. Estimation of the impact of genital warts on health-related  
19  
20 quality of life. *Sex Transm Infect.* 2008;84(3):161-6.  
21  
22  
23 37 Anhang R, Goodman A, Goldie SJ. HPV communication: review of existing research and  
24  
25 recommendations for patient education. *CA Cancer J Clin.* 2004;54(5):248-9.  
26  
27  
28 38 Sharma A, Méndez E, Yueh B, et al. Human papillomavirus–positive oral cavity and  
29  
30 oropharyngeal cancer patients do not have better quality-of-life trajectories. *Otolaryngol Head*  
31  
32 *Neck Surg.* 2012;146(5):739-45.  
33  
34  
35  
36  
37  
38  
39  
40  
41  
42  
43  
44  
45  
46  
47  
48  
49  
50  
51  
52  
53  
54  
55  
56  
57  
58  
59  
60

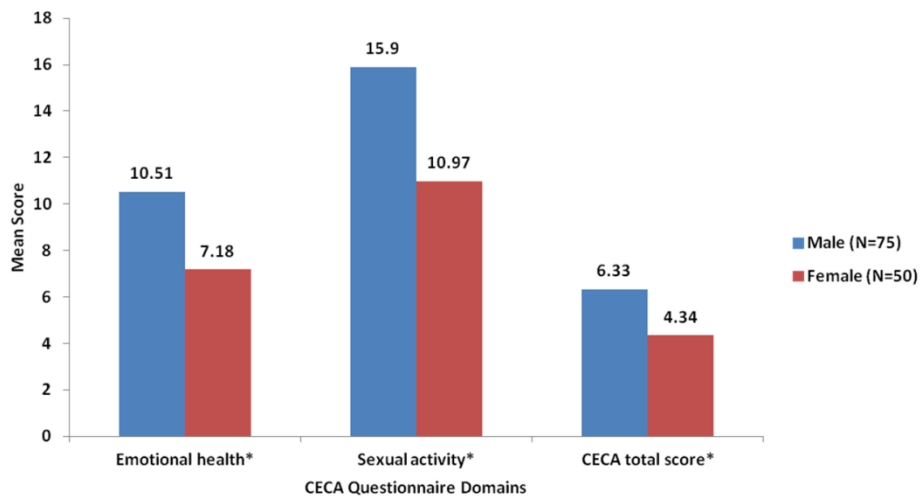

Figure 1. CECA Questionnaire Scores by Male and Female Patients with GW in South Korea / CECA=Cuestionario Específico para Condiloma Acuminado (in Spanish) – ‘Specific questionnaire for Condylomata Acuminata’; GW=genital warts

364x193mm (96 x 96 DPI)

## 1 APPENDIX

2 **Table A-1. Participating Physicians by Region in South Korea**

|               | PCP<br>(n=50) | DERM<br>(n=35) | OB/GYN<br>(n=65) | URO<br>(n=50) | Overall<br>(n=200) |
|---------------|---------------|----------------|------------------|---------------|--------------------|
| <b>Region</b> |               |                |                  |               |                    |
| Busan         | 6 (12.0%)     | 5 (14.3%)      | 9 (13.8%)        | 9 (18.0%)     | 29 (14.5%)         |
| Daegu         | 3 (6.0%)      | 3 (8.6%)       | 8 (12.3%)        | 7 (14.0%)     | 21 (10.5%)         |
| Daejeon       | 2 (4.0%)      | 2 (5.7%)       | 5 (7.7%)         | 4 (8.0%)      | 13 (6.5%)          |
| Gwangju       | 2 (4.0%)      | 3 (8.6%)       | 4 (6.2%)         | 4 (8.0%)      | 13 (6.5%)          |
| Seoul         | 37 (74.0%)    | 22 (62.9%)     | 39 (60.0%)       | 26 (52.0%)    | 124 (62.0%)        |
| Valid n       | 50            | 35             | 65               | 50            | 200                |

3  
4 DERM=dermatologist; OBGYN=obstetrician/gynecologist; PCP=primary care physician; URO=urologist

6 **Table A-2. Target Number Of Clinics Within A Specialty Per City in South Korea**

| City    | OB/GYN | URO | DERM | PCP | Overall |      |
|---------|--------|-----|------|-----|---------|------|
|         | N      | N   | N    | N   | N       | %    |
| Seoul   | 37     | 24  | 20   | 31  | 112     | 60%  |
| Busan   | 9      | 8   | 4    | 8   | 29      | 15%  |
| Daegu   | 7      | 7   | 3    | 4   | 21      | 11%  |
| Kwangju | 4      | 4   | 2    | 3   | 13      | 7%   |
| Daejeon | 4      | 4   | 1    | 4   | 13      | 7%   |
| Total   | 61     | 47  | 30   | 50  | 188     | 100% |

8 **Table A-3. HIP Questionnaire Scores by Female Patients and selected HPV-related**  
 9 **diseases in South Korea**

|                                        | HPV Disease (n=200) |                                      |                             |                    |                       |              |
|----------------------------------------|---------------------|--------------------------------------|-----------------------------|--------------------|-----------------------|--------------|
|                                        | Abnormal Pap (n=50) | Abnormal Pap and HPV positive (n=50) | Precancerous Lesions (n=50) | External GW (n=50) | No HPV Disease (n=50) | Overall      |
| <b>HPV Impact Profile total</b>        |                     |                                      |                             |                    |                       |              |
| Mean                                   | 50.54               | 52.59                                | 50.69                       | 59.61              | 44.98                 | 51.69        |
| 95% CI                                 | (47.0;              | (49.4;                               | (47.6; 53.8)                | (57.2;             | (41.4;                | (50.2; 53.2) |
| Valid n                                | 50                  | 50                                   | 49                          | 50                 | 50                    | 249          |
| <b>HPV Impact Profile total</b>        |                     |                                      |                             |                    |                       |              |
| No or little impact                    | 9 (18.0%)           | 7 (14.0%)                            | 7 (14.0%)                   |                    | 17                    | 40 (16.0%)   |
| Moderate impact                        | 40 (80.0%)          | 41 (82.0%)                           | 42 (84.0%)                  | 45                 | 30                    | 198          |
| Heavy psychological                    | 1 (2.0%)            | 2 (4.0%)                             | 1 (2.0%)                    | 5 (10.0%)          | 3 (6.0%)              | 12 (4.8%)    |
| Valid n                                | 50                  | 50                                   | 50                          | 50                 | 50                    | 250          |
| <b>Worries and concerns</b>            |                     |                                      |                             |                    |                       |              |
| Mean                                   | 52.64               | 54.20                                | 54.73                       | 67.14              | 41.94                 | 54.18        |
| 95% CI                                 | (46.0;              | (48.2;                               | (49.3; 60.1)                | (61.8;             | (35.5;                | (51.4; 57.0) |
| Valid n                                | 50                  | 50                                   | 49                          | 50                 | 49                    | 248          |
| <b>Emotional impact</b>                |                     |                                      |                             |                    |                       |              |
| Mean                                   | 53.16               | 56.24                                | 54.37                       | 60.52              | 42.32                 | 53.32        |
| 95% CI                                 | (48.8;              | (51.2;                               | (49.6; 59.2)                | (56.3;             | (37.8;                | (51.2; 55.5) |
| Valid n                                | 50                  | 50                                   | 49                          | 50                 | 50                    | 249          |
| <b>Sexual impact</b>                   |                     |                                      |                             |                    |                       |              |
| Mean                                   | 49.30               | 48.85                                | 51.73                       | 53.30              | 49.80                 | 50.61        |
| 95% CI                                 | (45.7;              | (45.6;                               | (46.6; 56.9)                | (49.8;             | (45.3;                | (48.8; 52.4) |
| Valid n                                | 50                  | 48                                   | 49                          | 50                 | 49                    | 246          |
| <b>Self-Image</b>                      |                     |                                      |                             |                    |                       |              |
| Mean                                   | 46.85               | 49.25                                | 40.20                       | 54.20              | 45.17                 | 47.16        |
| 95% CI                                 | (43.1;              | (45.9;                               | (36.8; 43.6)                | (51.2;             | (41.4;                | (45.5; 48.8) |
| Valid n                                | 50                  | 50                                   | 49                          | 50                 | 50                    | 249          |
| <b>Partner issues and transmission</b> |                     |                                      |                             |                    |                       |              |
| Mean                                   | 55.42               | 57.73                                | 51.71                       | 70.07              | 47.23                 | 56.51        |
| 95% CI                                 | (50.0;              | (52.5;                               | (45.8; 57.6)                | (66.4;             | (41.8;                | (54.1; 59.0) |
| Valid n                                | 48                  | 47                                   | 43                          | 47                 | 47                    | 232          |
| <b>Interactions with doctors</b>       |                     |                                      |                             |                    |                       |              |
| Mean                                   | 42.47               | 47.33                                | 46.26                       | 50.93              | 45.73                 | 46.55        |
| 95% CI                                 | (38.7;              | (43.5;                               | (42.4; 50.1)                | (46.8;             | (40.8;                | (44.7; 48.4) |
| Valid n                                | 50                  | 50                                   | 49                          | 50                 | 50                    | 249          |
| <b>Control - life impact</b>           |                     |                                      |                             |                    |                       |              |
| Mean                                   | 49.33               | 49.73                                | 49.66                       | 45.20              | 52.37                 | 49.26        |
| 95% CI                                 | (45.5;              | (46.3;                               | (45.9; 53.4)                | (40.7;             | (49.2;                | (47.6; 50.9) |

|         | HPV Disease (n=200) |                                      |                             |                    |                       |         |
|---------|---------------------|--------------------------------------|-----------------------------|--------------------|-----------------------|---------|
|         | Abnormal Pap (n=50) | Abnormal Pap and HPV positive (n=50) | Precancerous Lesions (n=50) | External GW (n=50) | No HPV Disease (n=50) | Overall |
| Valid n | 50                  | 50                                   | 49                          | 50                 | 50                    | 249     |

HPV=human papillomavirus; HIP=HPV impact profile; Pap=Papanicolaou test; GW=genital warts; CI=confidence interval

For peer review only

15 **Table A-4. EQ-5D Descriptive System Results by Female Patients and selected HPV-related Diseases in South Korea**  
 16 **(excluding control group)**

|                                                          | <b>Abnormal Pap Result (n=50)</b> | <b>Abnormal Pap Result and HPV positive (n=50)</b> | <b>Precancerous Lesions (n=50)</b> | <b>External GW (n=50)</b> | <b>Overall</b> | <b>P-value</b> |
|----------------------------------------------------------|-----------------------------------|----------------------------------------------------|------------------------------------|---------------------------|----------------|----------------|
| <b>Mobility</b>                                          |                                   |                                                    |                                    |                           |                |                |
| I have no problems walking about                         | 49 (98.0%)                        | 50 (100.0%)                                        | 47 (95.9%)                         | 47 (94.0%)                | 193 (97.0%)    | 0.3403         |
| I have some problems walking about                       | 1 (2.0%)                          |                                                    | 2 (4.1%)                           | 3 (6.0%)                  | 6 (3.0%)       |                |
| Valid n                                                  | 50                                | 50                                                 | 49                                 | 50                        | 199            |                |
| <b>Self-Care</b>                                         |                                   |                                                    |                                    |                           |                |                |
| I have no problems with self-care                        | 50 (100.0%)                       | 50 (100.0%)                                        | 48 (98.0%)                         | 49 (98.0%)                | 197 (99.0%)    | 0.6193         |
| I have some problems washing or dressing myself          |                                   |                                                    |                                    | 1 (2.0%)                  | 1 (0.5%)       |                |
| I am unable to wash or dress myself                      |                                   |                                                    | 1 (2.0%)                           |                           | 1 (0.5%)       |                |
| Valid n                                                  | 50                                | 50                                                 | 49                                 | 50                        | 199            |                |
| <b>Usual Activities</b>                                  |                                   |                                                    |                                    |                           |                |                |
| I have no problems with performing my usual activities   | 50 (100.0%)                       | 50 (100.0%)                                        | 47 (95.9%)                         | 49 (98.0%)                | 196 (98.5%)    | 0.1960         |
| I have some problems with performing my usual activities |                                   |                                                    | 2 (4.1%)                           | 1 (2.0%)                  | 3 (1.5%)       |                |
| Valid n                                                  | 50                                | 50                                                 | 49                                 | 50                        | 199            |                |
| <b>Pain - Discomfort</b>                                 |                                   |                                                    |                                    |                           |                |                |
| I have no pain or discomfort                             | 46 (92.0%)                        | 43 (86.0%)                                         | 42 (85.7%)                         | 34 (68.0%)                | 165 (82.9%)    | 0.0146         |
| I have moderate pain or discomfort                       | 4 (8.0%)                          | 7 (14.0%)                                          | 7 (14.3%)                          | 16 (32.0%)                | 34 (17.1%)     |                |
| Valid n                                                  | 50                                | 50                                                 | 49                                 | 50                        | 199            |                |
| <b>Anxiety - Depression</b>                              |                                   |                                                    |                                    |                           |                |                |
| I am not anxious or depressed                            | 40 (80.0%)                        | 38 (76.0%)                                         | 32 (65.3%)                         | 26 (52.0%)                | 136 (68.3%)    | 0.0387         |
| I am moderately anxious or depressed                     | 10 (20.0%)                        | 10 (20.0%)                                         | 15 (30.6%)                         | 21 (42.0%)                | 56 (28.1%)     |                |
| I am extremely anxious or depressed                      |                                   | 2 (4.0%)                                           | 2 (4.1%)                           | 3 (6.0%)                  | 7 (3.5%)       |                |
| Valid n                                                  | 50                                | 50                                                 | 49                                 | 50                        | 199            |                |

17 EQ-5D=EuroQol-5 Dimension; HPV=human papillomavirus; Pap=Papanicolaou test; GW=genital warts



**Table A-5. EQ-5D VAS and Utility Scores for Female Patients by selected HPV-related Diseases in South Korea (excluding control group)**

|                       | <b>Abnormal Pap<br/>(n=50)</b> | <b>Abnormal Pap<br/>and HPV<br/>positive (n=50)</b> | <b>Precancerous<br/>Lesions (n=50)</b> | <b>External GW<br/>(n=50)</b> | <b>Overall</b> | <b>p-value</b> |
|-----------------------|--------------------------------|-----------------------------------------------------|----------------------------------------|-------------------------------|----------------|----------------|
| <b>VAS (EQ-5D)</b>    |                                |                                                     |                                        |                               |                |                |
| Mean                  | 74.51                          | 73.78                                               | 71.50                                  | 68.92                         | 72.18          | <0.0001        |
| 95% CI                | (69.8; 79.2)                   | (70.0; 77.6)                                        | (66.5; 76.5)                           | (64.2; 73.6)                  | (69.9; 74.4)   |                |
| Valid n               | 49                             | 49                                                  | 42                                     | 50                            | 190            |                |
| <b>Utility values</b> |                                |                                                     |                                        |                               |                |                |
| Mean                  | 0.94                           | 0.93                                                | 0.89                                   | 0.85                          | 0.90           | <0.0001        |
| 95% CI                | (0.9; 1.0)                     | (0.9; 1.0)                                          | (0.9; 0.9)                             | (0.8; 0.9)                    | (0.9; 0.9)     |                |
| Valid n               | 50                             | 50                                                  | 49                                     | 50                            | 199            |                |

EQ-5D=EuroQol-5 Dimension; VAS=visual analog scores; HPV=human papillomavirus;

Pap=Papanicolaou test; GW=genital warts; CI=confidence interval

## STROBE Statement—checklist of items that should be included in reports of observational studies

|                              | Item No | Recommendation                                                                                                                                                                                                                                                                                                                                                                                                                                                                                                                                                                                                                                                                                                                                                          |
|------------------------------|---------|-------------------------------------------------------------------------------------------------------------------------------------------------------------------------------------------------------------------------------------------------------------------------------------------------------------------------------------------------------------------------------------------------------------------------------------------------------------------------------------------------------------------------------------------------------------------------------------------------------------------------------------------------------------------------------------------------------------------------------------------------------------------------|
| <b>Title and abstract</b>    | 1       | (a) Indicate the study's design with a commonly used term in the title or the abstract – <b>Pg. 3</b><br>(b) Provide in the abstract an informative and balanced summary of what was done and what was found – <b>Pg. 3</b>                                                                                                                                                                                                                                                                                                                                                                                                                                                                                                                                             |
| <b>Introduction</b>          |         |                                                                                                                                                                                                                                                                                                                                                                                                                                                                                                                                                                                                                                                                                                                                                                         |
| Background/rationale         | 2       | Explain the scientific background and rationale for the investigation being reported – <b>Pg. 5-6</b>                                                                                                                                                                                                                                                                                                                                                                                                                                                                                                                                                                                                                                                                   |
| Objectives                   | 3       | State specific objectives, including any prespecified hypotheses – <b>Pg. 6</b>                                                                                                                                                                                                                                                                                                                                                                                                                                                                                                                                                                                                                                                                                         |
| <b>Methods</b>               |         |                                                                                                                                                                                                                                                                                                                                                                                                                                                                                                                                                                                                                                                                                                                                                                         |
| Study design                 | 4       | Present key elements of study design early in the paper – <b>Pg. 7-11</b>                                                                                                                                                                                                                                                                                                                                                                                                                                                                                                                                                                                                                                                                                               |
| Setting                      | 5       | Describe the setting, locations, and relevant dates, including periods of recruitment, exposure, follow-up, and data collection – <b>Pgs. 7-11</b>                                                                                                                                                                                                                                                                                                                                                                                                                                                                                                                                                                                                                      |
| Participants                 | 6       | (a) <i>Cohort study</i> —Give the eligibility criteria, and the sources and methods of selection of participants. Describe methods of follow-up – <b>N/A</b><br><i>Case-control study</i> —Give the eligibility criteria, and the sources and methods of case ascertainment and control selection. Give the rationale for the choice of cases and controls – <b>N/A</b><br><i>Cross-sectional study</i> —Give the eligibility criteria, and the sources and methods of selection of participants – <b>Pgs. 7-11</b><br>(b) <i>Cohort study</i> —For matched studies, give matching criteria and number of exposed and unexposed – <b>N/A</b><br><i>Case-control study</i> —For matched studies, give matching criteria and the number of controls per case – <b>N/A</b> |
| Variables                    | 7       | Clearly define all outcomes, exposures, predictors, potential confounders, and effect modifiers. Give diagnostic criteria, if applicable – <b>Pgs. 10-11</b>                                                                                                                                                                                                                                                                                                                                                                                                                                                                                                                                                                                                            |
| Data sources/<br>measurement | 8*      | For each variable of interest, give sources of data and details of methods of assessment (measurement). Describe comparability of assessment methods if there is more than one group – <b>Pgs. 10-11</b>                                                                                                                                                                                                                                                                                                                                                                                                                                                                                                                                                                |
| Bias                         | 9       | Describe any efforts to address potential sources of bias – <b>Pg. 22</b>                                                                                                                                                                                                                                                                                                                                                                                                                                                                                                                                                                                                                                                                                               |
| Study size                   | 10      | Explain how the study size was arrived at – <b>Pg. 7-11</b>                                                                                                                                                                                                                                                                                                                                                                                                                                                                                                                                                                                                                                                                                                             |
| Quantitative variables       | 11      | Explain how quantitative variables were handled in the analyses. If applicable, describe which groupings were chosen and why – <b>Pg. 9-11</b>                                                                                                                                                                                                                                                                                                                                                                                                                                                                                                                                                                                                                          |
| Statistical methods          | 12      | (a) Describe all statistical methods, including those used to control for confounding – <b>Pgs. 10-11</b><br>(b) Describe any methods used to examine subgroups and interactions – <b>Pg. 8-10</b><br>(c) Explain how missing data were addressed – <b>N/A</b><br>(d) <i>Cohort study</i> —If applicable, explain how loss to follow-up was addressed – <b>N/A</b><br><i>Case-control study</i> —If applicable, explain how matching of cases and controls was addressed – <b>N/A</b><br><i>Cross-sectional study</i> —If applicable, describe analytical methods taking account of sampling strategy <b>Pgs. 7-11</b><br>(e) Describe any sensitivity analyses – <b>N/A</b>                                                                                            |

Continued on next page

**Results**

|                  |     |                                                                                                                                                                                                                                                                                                                                                                                                                                                       |
|------------------|-----|-------------------------------------------------------------------------------------------------------------------------------------------------------------------------------------------------------------------------------------------------------------------------------------------------------------------------------------------------------------------------------------------------------------------------------------------------------|
| Participants     | 13* | (a) Report numbers of individuals at each stage of study—eg numbers potentially eligible, examined for eligibility, confirmed eligible, included in the study, completing follow-up, and analysed – <b>Pgs. 11 - 12</b><br>(b) Give reasons for non-participation at each stage – <b>Pgs. 7-9</b><br>(c) Consider use of a flow diagram – <b>N/A</b>                                                                                                  |
| Descriptive data | 14* | (a) Give characteristics of study participants (eg, demographic, clinical, social) and information on exposures and potential confounders – <b>Pgs. 7-9, 11-13</b><br>(b) Indicate number of participants with missing data for each variable of interest – <b>N/A</b><br>(c) <i>Cohort study</i> —Summarise follow-up time (eg, average and total amount) – <b>N/A</b>                                                                               |
| Outcome data     | 15* | <i>Cohort study</i> —Report numbers of outcome events or summary measures over time – <b>N/A</b><br><i>Case-control study</i> —Report numbers in each exposure category, or summary measures of exposure – <b>N/A</b><br><i>Cross-sectional study</i> —Report numbers of outcome events or summary measures – <b>Pgs. 15-20</b>                                                                                                                       |
| Main results     | 16  | (a) Give unadjusted estimates and, if applicable, confounder-adjusted estimates and their precision (eg, 95% confidence interval). Make clear which confounders were adjusted for and why they were included – <b>N/A</b><br>(b) Report category boundaries when continuous variables were categorized – <b>N/A</b><br>(c) If relevant, consider translating estimates of relative risk into absolute risk for a meaningful time period. – <b>N/A</b> |
| Other analyses   | 17  | Report other analyses done—eg analyses of subgroups and interactions, and sensitivity analyses – <b>N/A</b>                                                                                                                                                                                                                                                                                                                                           |

**Discussion**

|                  |    |                                                                                                                                                                                                |
|------------------|----|------------------------------------------------------------------------------------------------------------------------------------------------------------------------------------------------|
| Key results      | 18 | Summarise key results with reference to study objectives – <b>Pgs. 11-20</b>                                                                                                                   |
| Limitations      | 19 | Discuss limitations of the study, taking into account sources of potential bias or imprecision. Discuss both direction and magnitude of any potential bias – <b>Pg. 22-23</b>                  |
| Interpretation   | 20 | Give a cautious overall interpretation of results considering objectives, limitations, multiplicity of analyses, results from similar studies, and other relevant evidence – <b>Pgs. 20-22</b> |
| Generalisability | 21 | Discuss the generalisability (external validity) of the study results – <b>Pgs. 20-22</b>                                                                                                      |

**Other information**

|         |    |                                                                                                                                                                              |
|---------|----|------------------------------------------------------------------------------------------------------------------------------------------------------------------------------|
| Funding | 22 | Give the source of funding and the role of the funders for the present study and, if applicable, for the original study on which the present article is based – <b>Pg. 1</b> |
|---------|----|------------------------------------------------------------------------------------------------------------------------------------------------------------------------------|

\*Give information separately for cases and controls in case-control studies and, if applicable, for exposed and unexposed groups in cohort and cross-sectional studies.

**Note:** An Explanation and Elaboration article discusses each checklist item and gives methodological background and published examples of transparent reporting. The STROBE checklist is best used in conjunction with this article (freely available on the Web sites of PLoS Medicine at <http://www.plosmedicine.org/>, Annals of Internal Medicine at <http://www.annals.org/>, and Epidemiology at <http://www.epidem.com/>). Information on the STROBE Initiative is available at [www.strobe-statement.org](http://www.strobe-statement.org).
