# Supplementary material for: Cross-sectional study estimating the psychosocial impact of genital warts and other anogenital diseases in South Korea
Source: PubMed Central journal article supplement — BMJ Open. 2019 Mar 20;9(3):e025035. doi: 10.1136/bmjopen-2018-025035 (PMC6475443; doi:10.1136/bmjopen-2018-025035), 2019-03-20
Supplement: bmjopen-2018-025035supp001.pdf [file bmjopen-2018-025035supp001.pdf]

1 **APPENDIX**

2 **Table A-1. Participating Physicians by Region in South Korea**

|               | <b>PCP<br/>(n=50)</b> | <b>DERM<br/>(n=35)</b> | <b>OB/GYN<br/>(n=65)</b> | <b>URO<br/>(n=50)</b> | <b>Overall<br/>(n=200)</b> |
|---------------|-----------------------|------------------------|--------------------------|-----------------------|----------------------------|
| <b>Region</b> |                       |                        |                          |                       |                            |
| Busan         | 6 (12.0%)             | 5 (14.3%)              | 9 (13.8%)                | 9 (18.0%)             | 29 (14.5%)                 |
| Daegu         | 3 (6.0%)              | 3 (8.6%)               | 8 (12.3%)                | 7 (14.0%)             | 21 (10.5%)                 |
| Daejeon       | 2 (4.0%)              | 2 (5.7%)               | 5 (7.7%)                 | 4 (8.0%)              | 13 (6.5%)                  |
| Gwangju       | 2 (4.0%)              | 3 (8.6%)               | 4 (6.2%)                 | 4 (8.0%)              | 13 (6.5%)                  |
| Seoul         | 37 (74.0%)            | 22 (62.9%)             | 39 (60.0%)               | 26 (52.0%)            | 124 (62.0%)                |
| Valid n       | 50                    | 35                     | 65                       | 50                    | 200                        |

3  
 4 DERM=dermatologist; OBGYN=obstetrician/gynecologist; PCP=primary care physician; URO=urologist

5  
 6 **Table A-2. Target Number Of Clinics Within A Specialty Per City in South Korea**

| <b>City</b> | <b>OB/GYN</b> | <b>URO</b> | <b>DERM</b> | <b>PCP</b> | <b>Overall</b> |          |
|-------------|---------------|------------|-------------|------------|----------------|----------|
|             | <b>N</b>      | <b>N</b>   | <b>N</b>    | <b>N</b>   | <b>N</b>       | <b>%</b> |
| Seoul       | 37            | 24         | 20          | 31         | 112            | 60%      |
| Busan       | 9             | 8          | 4           | 8          | 29             | 15%      |
| Daegu       | 7             | 7          | 3           | 4          | 21             | 11%      |
| Kwangju     | 4             | 4          | 2           | 3          | 13             | 7%       |
| Daejeon     | 4             | 4          | 1           | 4          | 13             | 7%       |
| Total       | 61            | 47         | 30          | 50         | 188            | 100%     |

7

8 **Table A-3. HIP Questionnaire Scores by Female Patients and selected HPV-related**  
 9 **diseases in South Korea**

|                                        | HPV Disease (n=200) |                                      |                             |                    |                       | Overall      |
|----------------------------------------|---------------------|--------------------------------------|-----------------------------|--------------------|-----------------------|--------------|
|                                        | Abnormal Pap (n=50) | Abnormal Pap and HPV positive (n=50) | Precancerous Lesions (n=50) | External GW (n=50) | No HPV Disease (n=50) |              |
| <b>HPV Impact Profile total</b>        |                     |                                      |                             |                    |                       |              |
| Mean                                   | 50.54               | 52.59                                | 50.69                       | 59.61              | 44.98                 | 51.69        |
| 95% CI                                 | (47.0;              | (49.4;                               | (47.6; 53.8)                | (57.2;             | (41.4;                | (50.2; 53.2) |
| Valid n                                | 50                  | 50                                   | 49                          | 50                 | 50                    | 249          |
| <b>HPV Impact Profile total</b>        |                     |                                      |                             |                    |                       |              |
| No or little impact                    | 9 (18.0%)           | 7 (14.0%)                            | 7 (14.0%)                   |                    | 17                    | 40 (16.0%)   |
| Moderate impact                        | 40 (80.0%)          | 41 (82.0%)                           | 42 (84.0%)                  | 45                 | 30                    | 198          |
| Heavy psychological                    | 1 (2.0%)            | 2 (4.0%)                             | 1 (2.0%)                    | 5 (10.0%)          | 3 (6.0%)              | 12 (4.8%)    |
| Valid n                                | 50                  | 50                                   | 50                          | 50                 | 50                    | 250          |
| <b>Worries and concerns</b>            |                     |                                      |                             |                    |                       |              |
| Mean                                   | 52.64               | 54.20                                | 54.73                       | 67.14              | 41.94                 | 54.18        |
| 95% CI                                 | (46.0;              | (48.2;                               | (49.3; 60.1)                | (61.8;             | (35.5;                | (51.4; 57.0) |
| Valid n                                | 50                  | 50                                   | 49                          | 50                 | 49                    | 248          |
| <b>Emotional impact</b>                |                     |                                      |                             |                    |                       |              |
| Mean                                   | 53.16               | 56.24                                | 54.37                       | 60.52              | 42.32                 | 53.32        |
| 95% CI                                 | (48.8;              | (51.2;                               | (49.6; 59.2)                | (56.3;             | (37.8;                | (51.2; 55.5) |
| Valid n                                | 50                  | 50                                   | 49                          | 50                 | 50                    | 249          |
| <b>Sexual impact</b>                   |                     |                                      |                             |                    |                       |              |
| Mean                                   | 49.30               | 48.85                                | 51.73                       | 53.30              | 49.80                 | 50.61        |
| 95% CI                                 | (45.7;              | (45.6;                               | (46.6; 56.9)                | (49.8;             | (45.3;                | (48.8; 52.4) |
| Valid n                                | 50                  | 48                                   | 49                          | 50                 | 49                    | 246          |
| <b>Self-Image</b>                      |                     |                                      |                             |                    |                       |              |
| Mean                                   | 46.85               | 49.25                                | 40.20                       | 54.20              | 45.17                 | 47.16        |
| 95% CI                                 | (43.1;              | (45.9;                               | (36.8; 43.6)                | (51.2;             | (41.4;                | (45.5; 48.8) |
| Valid n                                | 50                  | 50                                   | 49                          | 50                 | 50                    | 249          |
| <b>Partner issues and transmission</b> |                     |                                      |                             |                    |                       |              |
| Mean                                   | 55.42               | 57.73                                | 51.71                       | 70.07              | 47.23                 | 56.51        |
| 95% CI                                 | (50.0;              | (52.5;                               | (45.8; 57.6)                | (66.4;             | (41.8;                | (54.1; 59.0) |
| Valid n                                | 48                  | 47                                   | 43                          | 47                 | 47                    | 232          |
| <b>Interactions with doctors</b>       |                     |                                      |                             |                    |                       |              |
| Mean                                   | 42.47               | 47.33                                | 46.26                       | 50.93              | 45.73                 | 46.55        |
| 95% CI                                 | (38.7;              | (43.5;                               | (42.4; 50.1)                | (46.8;             | (40.8;                | (44.7; 48.4) |
| Valid n                                | 50                  | 50                                   | 49                          | 50                 | 50                    | 249          |
| <b>Control - life impact</b>           |                     |                                      |                             |                    |                       |              |
| Mean                                   | 49.33               | 49.73                                | 49.66                       | 45.20              | 52.37                 | 49.26        |
| 95% CI                                 | (45.5;              | (46.3;                               | (45.9; 53.4)                | (40.7;             | (49.2;                | (47.6; 50.9) |

|         | HPV Disease (n=200) |                                      |                             |                    |                       |         |
|---------|---------------------|--------------------------------------|-----------------------------|--------------------|-----------------------|---------|
|         | Abnormal Pap (n=50) | Abnormal Pap and HPV positive (n=50) | Precancerous Lesions (n=50) | External GW (n=50) | No HPV Disease (n=50) | Overall |
| Valid n | 50                  | 50                                   | 49                          | 50                 | 50                    | 249     |

10

11 HPV=human papillomavirus; HIP=HPV impact profile; Pap=Papanicolaou test; GW=genital warts; CI=confidence

12 interval

13

14

15 **Table A-4. EQ-5D Descriptive System Results by Female Patients and selected HPV-related Diseases in South Korea**  
 16 **(excluding control group)**

|                                                          | <b>Abnormal Pap Result (n=50)</b> | <b>Abnormal Pap Result and HPV positive (n=50)</b> | <b>Precancerous Lesions (n=50)</b> | <b>External GW (n=50)</b> | <b>Overall</b> | <b>P-value</b> |
|----------------------------------------------------------|-----------------------------------|----------------------------------------------------|------------------------------------|---------------------------|----------------|----------------|
| <b>Mobility</b>                                          |                                   |                                                    |                                    |                           |                |                |
| I have no problems walking about                         | 49 (98.0%)                        | 50 (100.0%)                                        | 47 (95.9%)                         | 47 (94.0%)                | 193 (97.0%)    | 0.3403         |
| I have some problems walking about                       | 1 (2.0%)                          |                                                    | 2 (4.1%)                           | 3 (6.0%)                  | 6 (3.0%)       |                |
| Valid n                                                  | 50                                | 50                                                 | 49                                 | 50                        | 199            |                |
| <b>Self-Care</b>                                         |                                   |                                                    |                                    |                           |                |                |
| I have no problems with self-care                        | 50 (100.0%)                       | 50 (100.0%)                                        | 48 (98.0%)                         | 49 (98.0%)                | 197 (99.0%)    | 0.6193         |
| I have some problems washing or dressing myself          |                                   |                                                    |                                    | 1 (2.0%)                  | 1 (0.5%)       |                |
| I am unable to wash or dress myself                      |                                   |                                                    | 1 (2.0%)                           |                           | 1 (0.5%)       |                |
| Valid n                                                  | 50                                | 50                                                 | 49                                 | 50                        | 199            |                |
| <b>Usual Activities</b>                                  |                                   |                                                    |                                    |                           |                |                |
| I have no problems with performing my usual activities   | 50 (100.0%)                       | 50 (100.0%)                                        | 47 (95.9%)                         | 49 (98.0%)                | 196 (98.5%)    | 0.1960         |
| I have some problems with performing my usual activities |                                   |                                                    | 2 (4.1%)                           | 1 (2.0%)                  | 3 (1.5%)       |                |
| Valid n                                                  | 50                                | 50                                                 | 49                                 | 50                        | 199            |                |
| <b>Pain - Discomfort</b>                                 |                                   |                                                    |                                    |                           |                |                |
| I have no pain or discomfort                             | 46 (92.0%)                        | 43 (86.0%)                                         | 42 (85.7%)                         | 34 (68.0%)                | 165 (82.9%)    | 0.0146         |
| I have moderate pain or discomfort                       | 4 (8.0%)                          | 7 (14.0%)                                          | 7 (14.3%)                          | 16 (32.0%)                | 34 (17.1%)     |                |
| Valid n                                                  | 50                                | 50                                                 | 49                                 | 50                        | 199            |                |
| <b>Anxiety - Depression</b>                              |                                   |                                                    |                                    |                           |                |                |
| I am not anxious or depressed                            | 40 (80.0%)                        | 38 (76.0%)                                         | 32 (65.3%)                         | 26 (52.0%)                | 136 (68.3%)    | 0.0387         |
| I am moderately anxious or depressed                     | 10 (20.0%)                        | 10 (20.0%)                                         | 15 (30.6%)                         | 21 (42.0%)                | 56 (28.1%)     |                |
| I am extremely anxious or depressed                      |                                   | 2 (4.0%)                                           | 2 (4.1%)                           | 3 (6.0%)                  | 7 (3.5%)       |                |
| Valid n                                                  | 50                                | 50                                                 | 49                                 | 50                        | 199            |                |

17 EQ-5D=EuroQol-5 Dimension; HPV=human papillomavirus; Pap=Papanicolaou test; GW=genital warts

**Table A-5. EQ-5D VAS and Utility Scores for Female Patients by selected HPV-related Diseases in South Korea (excluding control group)**

|                       | <b>Abnormal Pap<br/>(n=50)</b> | <b>Abnormal Pap<br/>and HPV<br/>positive (n=50)</b> | <b>Precancerous<br/>Lesions (n=50)</b> | <b>External GW<br/>(n=50)</b> | <b>Overall</b> | <b>p-value</b> |
|-----------------------|--------------------------------|-----------------------------------------------------|----------------------------------------|-------------------------------|----------------|----------------|
| <b>VAS (EQ-5D)</b>    |                                |                                                     |                                        |                               |                |                |
| Mean                  | 74.51                          | 73.78                                               | 71.50                                  | 68.92                         | 72.18          | <0.0001        |
| 95% CI                | (69.8; 79.2)                   | (70.0; 77.6)                                        | (66.5; 76.5)                           | (64.2; 73.6)                  | (69.9; 74.4)   |                |
| Valid n               | 49                             | 49                                                  | 42                                     | 50                            | 190            |                |
| <b>Utility values</b> |                                |                                                     |                                        |                               |                |                |
| Mean                  | 0.94                           | 0.93                                                | 0.89                                   | 0.85                          | 0.90           | <0.0001        |
| 95% CI                | (0.9; 1.0)                     | (0.9; 1.0)                                          | (0.9; 0.9)                             | (0.8; 0.9)                    | (0.9; 0.9)     |                |
| Valid n               | 50                             | 50                                                  | 49                                     | 50                            | 199            |                |

EQ-5D=EuroQol-5 Dimension; VAS=visual analog scores; HPV=human papillomavirus;

Pap=Papanicolaou test; GW=genital warts; CI=confidence interval
